# Supplementary material
Source: publisher figshare collection journal article supplement (https://gsajournals.figshare.com/ndownloader/files/24159497)
Supplement: Supplementary file 1 [file 24159497]

## Sheet: File_S2
For each module, shown below are:
	(1) Biological phenomenon that the module most likely represents, based on examination of (2) and (3)
	(2) The perturbation (from our compendium of 716 perturbations) that activates the module most strongly. If there is no perturbation in which the module explains at least 5% of gene expression variance (i.e. SVE > 0.05), "none" is shown.
	(3) Top two GO terms (in each GO category) enriched in each hemi-module. Significant GO (q < 0.1) terms are shown in bold.
For a complete list of activating perturbations, GO terms and other information about each hemi-module, please see Tool 3 (Module Annotation Pages) on the Shiny App at http://genemodules.org/
(1) Module likely represents		(2) Perturbation that most strongly activates the module			(3) Hemi-module A GO terms						(2) Hemi-module B GO terms
	Module	GEO ID	Description	SVE	Biological Process		Molecular Function		Cellular Component		Biological Process		Molecular Function		Cellular Component
	1	none	none	none	GO:0006355	regulation of transcription, DNA-templated	GO:0003700	DNA-binding transcription factor activity	GO:0005776	autophagosome	GO:0007617	mating behavior	GO:0000224	peptide-N4-(N-acetyl-beta-glucosaminyl)asparagine amidase activity	GO:0031090	organelle membrane
					GO:0019430	removal of superoxide radicals	GO:0046872	metal ion binding	GO:0099523	presynaptic cytosol	GO:0006515	protein quality control for misfolded or incompletely synthesized proteins	GO:0008887	glycerate kinase activity	GO:0005903	brush border
	2	none	none	none	GO:1902473	regulation of protein localization to synapse	GO:0046872	metal ion binding	GO:0099572	postsynaptic specialization	GO:0045324	late endosome to vacuole transport	GO:0061608	nuclear import signal receptor activity	GO:0002178	palmitoyltransferase complex
					GO:0006777	Mo-molybdopterin cofactor biosynthetic process	GO:0003700	DNA-binding transcription factor activity	GO:0099634	postsynaptic specialization membrane	GO:0007127	meiosis I	GO:0008139	nuclear localization sequence binding	GO:0005780	extrinsic component of intraperoxisomal membrane
	3	none	none	none	GO:0045087	innate immune response	GO:0030246	carbohydrate binding	GO:0005844	polysome	GO:0055114	oxidation-reduction process	GO:0016491	oxidoreductase activity	GO:0043231	intracellular membrane-bounded organelle
					GO:0050830	defense response to Gram-positive bacterium	GO:0003796	lysozyme activity	GO:0009925	basal plasma membrane	GO:0006749	glutathione metabolic process	GO:0016705	oxidoreductase activity, acting on paired donors, with incorporation or reduction of molecular oxygen	GO:0005764	lysosome
	4	GSE9665	143 min vs. 101 min embryo	-0.67	GO:0031123	RNA 3'-end processing	GO:0046872	metal ion binding	GO:0005829	cytosol	GO:0006627	protein processing involved in protein targeting to mitochondrion	GO:0043812	phosphatidylinositol-4-phosphate phosphatase activity	GO:0030690	Noc1p-Noc2p complex
					GO:0043631	RNA polyadenylation	GO:0004652	polynucleotide adenylyltransferase activity	GO:0005760	gamma DNA polymerase complex	GO:0036498	IRE1-mediated unfolded protein response	GO:0042578	phosphoric ester hydrolase activity	GO:0030691	Noc2p-Noc3p complex
	5	none	none	none	GO:0006182	cGMP biosynthetic process	GO:0004383	guanylate cyclase activity	GO:0016021	integral component of membrane	GO:0007218	neuropeptide signaling pathway	GO:0000210	NAD+ diphosphatase activity	GO:0098894	extrinsic component of presynaptic endocytic zone membrane
					GO:0009190	cyclic nucleotide biosynthetic process	GO:0005330	dopamine:sodium symporter activity	GO:0016020	membrane	GO:0006742	NADP catabolic process	GO:0047453	ATP-dependent NAD(P)H-hydrate dehydratase activity	GO:0031253	cell projection membrane
	6	GSE18132	oga-1 vs. N2	-0.08	GO:0007186	G protein-coupled receptor signaling pathway	GO:0004930	G protein-coupled receptor activity	GO:0016021	integral component of membrane	GO:0006570	tyrosine metabolic process	GO:0004411	homogentisate 1,2-dioxygenase activity	GO:0043073	germ cell nucleus
					GO:0007165	signal transduction	GO:0019825	oxygen binding	GO:0016020	membrane	GO:0097190	apoptotic signaling pathway	GO:0097199	cysteine-type endopeptidase activity involved in apoptotic signaling pathway	GO:0097730	non-motile cilium
	7	GSE21784	15 day-old vs. 6 day-old adults	0.08	GO:0018105	peptidyl-serine phosphorylation	GO:0004674	protein serine/threonine kinase activity	GO:0016021	integral component of membrane	GO:0006515	protein quality control for misfolded or incompletely synthesized proteins	GO:0000224	peptide-N4-(N-acetyl-beta-glucosaminyl)asparagine amidase activity	GO:0031234	extrinsic component of cytoplasmic side of plasma membrane
					GO:0017121	phospholipid scrambling	GO:0015075	ion transmembrane transporter activity	GO:0016020	membrane	GO:0006516	glycoprotein catabolic process	GO:0071949	FAD binding	GO:0030175	filopodium
	8	none	none	none	GO:0006189	'de novo' IMP biosynthetic process	GO:0003937	IMP cyclohydrolase activity	GO:0005746	mitochondrial respiratory chain	GO:0019835	cytolysis	GO:0003796	lysozyme activity	GO:0031906	late endosome lumen
					GO:0006164	purine nucleotide biosynthetic process	GO:0004044	amidophosphoribosyltransferase activity	GO:0030173	integral component of Golgi membrane	GO:0035725	sodium ion transmembrane transport	GO:0005272	sodium channel activity	GO:0034777	recycling endosome lumen
	9	GSE38997	L1 vs. L1 + 21 hrs	0.17	GO:0055114	oxidation-reduction process	GO:0016491	oxidoreductase activity	GO:0005777	peroxisome	GO:0036498	IRE1-mediated unfolded protein response	GO:0016298	lipase activity	GO:0005739	mitochondrion
					GO:0006635	fatty acid beta-oxidation	GO:0004095	carnitine O-palmitoyltransferase activity	GO:0005778	peroxisomal membrane	GO:0008209	androgen metabolic process	GO:0030283	testosterone dehydrogenase [NAD(P)] activity	GO:0005751	mitochondrial respiratory chain complex IV
Response to osmotic stress	10	GSE19310	osm-7 vs. N2	0.16	GO:0055085	transmembrane transport	GO:0016798	hydrolase activity, acting on glycosyl bonds	GO:0009331	glycerol-3-phosphate dehydrogenase complex	GO:0006833	water transport	GO:0015144	carbohydrate transmembrane transporter activity	GO:0005960	glycine cleavage complex
					GO:0006116	NADH oxidation	GO:0030170	pyridoxal phosphate binding	GO:0031090	organelle membrane	GO:0034219	carbohydrate transmembrane transport	GO:0015250	water channel activity	GO:0031417	NatC complex
	11	none	none	none	GO:0006896	Golgi to vacuole transport	GO:0004300	enoyl-CoA hydratase activity	GO:0005884	actin filament	GO:0043053	dauer entry	GO:0008107	galactoside 2-alpha-L-fucosyltransferase activity	GO:0098894	extrinsic component of presynaptic endocytic zone membrane
					GO:0006623	protein targeting to vacuole	GO:0005516	calmodulin binding	GO:0098830	presynaptic endosome	GO:0043413	macromolecule glycosylation	GO:0005229	intracellular calcium activated chloride channel activity	GO:0001726	ruffle
	12	GSE39012	arsenic-treated vs. untreated	-0.21	GO:0006164	purine nucleotide biosynthetic process	GO:0000287	magnesium ion binding	GO:0002189	ribose phosphate diphosphokinase complex	GO:0034620	cellular response to unfolded protein	GO:0051082	unfolded protein binding	GO:0017109	glutamate-cysteine ligase complex
					GO:0006189	'de novo' IMP biosynthetic process	GO:0003993	acid phosphatase activity	GO:0005737	cytoplasm	GO:0034605	cellular response to heat	GO:0042623	ATPase activity, coupled	GO:0034098	VCP-NPL4-UFD1 AAA ATPase complex
	13	none	none	none	GO:0007617	mating behavior	GO:0044325	ion channel binding	GO:0016020	membrane	GO:0018149	peptide cross-linking	GO:0004831	tyrosine-tRNA ligase activity	GO:0005911	cell-cell junction
					GO:0023041	neuronal signal transduction	GO:0015278	calcium-release channel activity	GO:0016021	integral component of membrane	GO:0098869	cellular oxidant detoxification	GO:0005006	epidermal growth factor-activated receptor activity	GO:0043196	varicosity
	14	none	none	none	GO:0030198	extracellular matrix organization	GO:0042302	structural constituent of cuticle	GO:0005615	extracellular space	GO:0006811	ion transport	GO:0042302	structural constituent of cuticle	GO:0005892	acetylcholine-gated channel complex
					GO:0014070	response to organic cyclic compound	GO:0008237	metallopeptidase activity	GO:0098733	hemidesmosome associated protein complex	GO:2000117	negative regulation of cysteine-type endopeptidase activity	GO:0005384	manganese ion transmembrane transporter activity	GO:0031090	organelle membrane
Response to heat	15	GSE23528	Warm-cold entrained 14 hr vs 2 hr	0.25	GO:0009408	response to heat	GO:0016810	hydrolase activity, acting on carbon-nitrogen (but not peptide) bonds	GO:0016323	basolateral plasma membrane	GO:0055114	oxidation-reduction process	GO:0003729	mRNA binding	GO:0043231	intracellular membrane-bounded organelle
					GO:0019547	arginine catabolic process to ornithine	GO:0004335	galactokinase activity	GO:0031463	Cul3-RING ubiquitin ligase complex	GO:0006082	organic acid metabolic process	GO:0004497	monooxygenase activity	GO:0005780	extrinsic component of intraperoxisomal membrane
	16	GSE27677	jun-1 vs. N2	0.07	GO:0042048	olfactory behavior	GO:0038022	G protein-coupled olfactory receptor activity	GO:0016021	integral component of membrane	GO:0000165	MAPK cascade	GO:0048365	Rac GTPase binding	GO:0001726	ruffle
					GO:0007606	sensory perception of chemical stimulus	GO:0004888	transmembrane signaling receptor activity	GO:0016020	membrane	GO:0046856	phosphatidylinositol dephosphorylation	GO:0005249	voltage-gated potassium channel activity	GO:0002116	semaphorin receptor complex
	17	GSE9665	hlh-1 vs. control embryo	-0.17	GO:0033227	dsRNA transport	GO:0051033	RNA transmembrane transporter activity	GO:0009986	cell surface	GO:0043547	positive regulation of GTPase activity	GO:0000166	nucleotide binding	GO:0030121	AP-1 adaptor complex
					GO:0050658	RNA transport	GO:0003725	double-stranded RNA binding	GO:0048471	perinuclear region of cytoplasm	GO:0016192	vesicle-mediated transport	GO:0005524	ATP binding	GO:0034388	Pwp2p-containing subcomplex of 90S preribosome
	18	GSE54024	nuo-6 vs. isp-1; ced-4	0.1	GO:0007218	neuropeptide signaling pathway	GO:0005179	hormone activity	GO:0005576	extracellular region	GO:0030207	chondroitin sulfate catabolic process	GO:0004415	hyalurononglucosaminidase activity	GO:0044798	nuclear transcription factor complex
					GO:1905905	pharyngeal gland morphogenesis	GO:0071855	neuropeptide receptor binding	GO:0005615	extracellular space	GO:0048620	post-embryonic hindgut morphogenesis	GO:0015929	hexosaminidase activity	GO:0071944	cell periphery
	19	none	none	none	GO:0009653	anatomical structure morphogenesis	GO:0032422	purine-rich negative regulatory element binding	GO:1990805	central cylinder	GO:0006082	organic acid metabolic process	GO:0008395	steroid hydroxylase activity	GO:0043231	intracellular membrane-bounded organelle
					GO:1904491	protein localization to ciliary transition zone	GO:0001227	DNA-binding transcription repressor activity, RNA polymerase II-specific	GO:0032797	SMN complex	GO:0042738	exogenous drug catabolic process	GO:0016712	oxidoreductase activity, acting on paired donors, with incorporation or reduction of molecular oxygen, reduced flavin or flavoprotein as one donor, and incorporation of one atom of oxygen	GO:0000799	nuclear condensin complex
Lipid metabolism upon starvation in L1s	20	GSE11055	6hr vs. 0hr starved L1s	0.32	GO:0055114	oxidation-reduction process	GO:0016491	oxidoreductase activity	GO:0005739	mitochondrion	GO:0055114	oxidation-reduction process	GO:0016491	oxidoreductase activity	GO:0043231	intracellular membrane-bounded organelle
					GO:0006631	fatty acid metabolic process	GO:0003824	catalytic activity	GO:0005811	lipid droplet	GO:0060828	regulation of canonical Wnt signaling pathway	GO:0004784	superoxide dismutase activity	GO:0005746	mitochondrial respiratory chain
	21	GSE23528	Light-dark entrained vs. non-entrained	-0.08	GO:0007154	cell communication	GO:0016298	lipase activity	GO:0031462	Cul2-RING ubiquitin ligase complex	GO:0060828	regulation of canonical Wnt signaling pathway	GO:0051018	protein kinase A binding	GO:0005746	mitochondrial respiratory chain
					GO:0008652	cellular amino acid biosynthetic process	GO:0019001	guanyl nucleotide binding	GO:0005879	axonemal microtubule	GO:0019430	removal of superoxide radicals	GO:0004784	superoxide dismutase activity	GO:0046540	U4/U6 x U5 tri-snRNP complex
	22	GSE9301	oxidative stress with skn-1 RNAi vs. oxidative stress	0.11	GO:0009792	embryo development ending in birth or egg hatching	GO:0005515	protein binding	GO:0005737	cytoplasm	GO:0045786	negative regulation of cell cycle	GO:0052856	NADHX epimerase activity	GO:0005815	microtubule organizing center
					GO:0006897	endocytosis	GO:0000166	nucleotide binding	GO:0005884	actin filament	GO:0048213	Golgi vesicle prefusion complex stabilization	GO:0052857	NADPHX epimerase activity	GO:1902636	kinociliary basal body
Neuronal genes / neuropeptide signaling	23	GSE8004	RNA from neurons vs. RNA from all cells	0.59	GO:0007218	neuropeptide signaling pathway	GO:0005216	ion channel activity	GO:0045202	synapse	GO:0008615	pyridoxine biosynthetic process	GO:0004032	alditol:NADP+ 1-oxidoreductase activity	GO:0005829	cytosol
					GO:0007165	signal transduction	GO:0004930	G protein-coupled receptor activity	GO:0043005	neuron projection	GO:0010644	cell communication by electrical coupling	GO:0008106	alcohol dehydrogenase (NADP+) activity	GO:0015629	actin cytoskeleton
	24	none	none	none	GO:0034514	mitochondrial unfolded protein response	GO:0004984	olfactory receptor activity	GO:0009368	endopeptidase Clp complex	GO:0016182	synaptic vesicle budding from endosome	GO:0004648	O-phospho-L-serine:2-oxoglutarate aminotransferase activity	GO:0098830	presynaptic endosome
					GO:0050907	detection of chemical stimulus involved in sensory perception	GO:0030246	carbohydrate binding	GO:0031430	M band	GO:0019646	aerobic electron transport chain	GO:0015453	oxidoreduction-driven active transmembrane transporter activity	GO:0030123	AP-3 adaptor complex
	25	GSE54011	0.4mM selenium vs. no selenium	0.08	GO:0050830	defense response to Gram-positive bacterium	GO:0030246	carbohydrate binding	GO:0005764	lysosome	GO:0006082	organic acid metabolic process	GO:0008395	steroid hydroxylase activity	GO:0043231	intracellular membrane-bounded organelle
					GO:0070221	sulfide oxidation, using sulfide:quinone oxidoreductase	GO:0070224	sulfide:quinone oxidoreductase activity	GO:0005615	extracellular space	GO:0042738	exogenous drug catabolic process	GO:0016712	oxidoreductase activity, acting on paired donors, with incorporation or reduction of molecular oxygen, reduced flavin or flavoprotein as one donor, and incorporation of one atom of oxygen	GO:0031672	A band
	26	none	none	none	GO:0030951	establishment or maintenance of microtubule cytoskeleton polarity	GO:0004336	galactosylceramidase activity	GO:0030992	intraciliary transport particle B	GO:0010038	response to metal ion	GO:0004451	isocitrate lyase activity	GO:0010494	cytoplasmic stress granule
					GO:0006517	protein deglycosylation	GO:0005220	inositol 1,4,5-trisphosphate-sensitive calcium-release channel activity	GO:0097025	MPP7-DLG1-LIN7 complex	GO:0072488	ammonium transmembrane transport	GO:0004474	malate synthase activity	GO:0035657	eRF1 methyltransferase complex
	27	none	none	none	GO:0030968	endoplasmic reticulum unfolded protein response	GO:0004062	aryl sulfotransferase activity	GO:0016507	mitochondrial fatty acid beta-oxidation multienzyme complex	GO:0006517	protein deglycosylation	GO:0000224	peptide-N4-(N-acetyl-beta-glucosaminyl)asparagine amidase activity	GO:0016327	apicolateral plasma membrane
					GO:0006683	galactosylceramide catabolic process	GO:0004336	galactosylceramidase activity	GO:0030877	beta-catenin destruction complex	GO:0006515	protein quality control for misfolded or incompletely synthesized proteins	GO:0016231	beta-N-acetylglucosaminidase activity	GO:0019897	extrinsic component of plasma membrane
	28	GSE30505	ash-2 RNAi vs. E.V. L3	0.06	GO:0009405	pathogenesis	GO:0046982	protein heterodimerization activity	GO:0000786	nucleosome	GO:0006535	cysteine biosynthetic process from serine	GO:0004124	cysteine synthase activity	GO:0005746	mitochondrial respiratory chain
					GO:0035915	pore formation in membrane of other organism	GO:0003677	DNA binding	GO:0043541	UDP-N-acetylglucosamine transferase complex	GO:0019344	cysteine biosynthetic process	GO:0050017	L-3-cyanoalanine synthase activity	GO:0000228	nuclear chromosome
	29	GSE43952	pcca-1 vs. N2 fed Comamonas	-0.05	GO:0055085	transmembrane transport	GO:0016705	oxidoreductase activity, acting on paired donors, with incorporation or reduction of molecular oxygen	GO:0016021	integral component of membrane	GO:0097501	stress response to metal ion	GO:0004778	succinyl-CoA hydrolase activity	GO:0016014	dystrobrevin complex
					GO:0006516	glycoprotein catabolic process	GO:0022857	transmembrane transporter activity	GO:0043231	intracellular membrane-bounded organelle	GO:0045087	innate immune response	GO:0016289	CoA hydrolase activity	GO:0044840	gut granule
	30	none	none	none	GO:0015807	L-amino acid transport	GO:0017060	3-galactosyl-N-acetylglucosaminide 4-alpha-L-fucosyltransferase activity	GO:0035658	Mon1-Ccz1 complex	GO:0048511	rhythmic process	GO:0047389	glycerophosphocholine phosphodiesterase activity	GO:0031415	NatA complex
					GO:0032793	positive regulation of CREB transcription factor activity	GO:0004683	calmodulin-dependent protein kinase activity	GO:0005751	mitochondrial respiratory chain complex IV	GO:0046475	glycerophospholipid catabolic process	GO:2001070	starch binding	GO:0005575	cellular_component
	31	GSE48347	smo-1 RNAi vs. E.V. embryos	0.19	GO:0007613	memory	GO:0005347	ATP transmembrane transporter activity	GO:0032991	protein-containing complex	GO:0006657	CDP-choline pathway	GO:0004103	choline kinase activity	GO:0036038	MKS complex
					GO:0023052	signaling	GO:0008446	GDP-mannose 4,6-dehydratase activity	GO:0061803	posterior cell cortex	GO:0008654	phospholipid biosynthetic process	GO:0001156	TFIIIC-class transcription factor complex binding	GO:0000126	transcription factor TFIIIB complex
Response to foreign RNA	32	GSE41056	rde-1 infected vs. uninfected with with Orsay virus	0.34	GO:0036498	IRE1-mediated unfolded protein response	GO:0033149	FFAT motif binding	GO:0019008	molybdopterin synthase complex	GO:0055114	oxidation-reduction process	GO:0016491	oxidoreductase activity	GO:0043231	intracellular membrane-bounded organelle
					GO:0031146	SCF-dependent proteasomal ubiquitin-dependent protein catabolic process	GO:0051082	unfolded protein binding	GO:0031380	nuclear RNA-directed RNA polymerase complex	GO:0030497	fatty acid elongation	GO:0016705	oxidoreductase activity, acting on paired donors, with incorporation or reduction of molecular oxygen	GO:0005783	endoplasmic reticulum
	33	none	none	none	GO:0009410	response to xenobiotic stimulus	GO:0005216	ion channel activity	GO:0005925	focal adhesion	GO:0040001	establishment of mitotic spindle localization	GO:0008270	zinc ion binding	GO:0010494	cytoplasmic stress granule
					GO:0045892	negative regulation of transcription, DNA-templated	GO:0005244	voltage-gated ion channel activity	GO:0043296	apical junction complex	GO:0034063	stress granule assembly	GO:0008139	nuclear localization sequence binding	GO:0035097	histone methyltransferase complex
ER UPR	34	GSE2180	pie-1 vs. mex-3; skn-1 41 min. after 4-cell embryo (high vs. low skn-1 activity)	-0.68	GO:0006457	protein folding	GO:0051082	unfolded protein binding	GO:0005783	endoplasmic reticulum	GO:0045944	positive regulation of transcription by RNA polymerase II	GO:0061631	ubiquitin conjugating enzyme activity	GO:0005634	nucleus
					GO:0015031	protein transport	GO:0000166	nucleotide binding	GO:0005737	cytoplasm	GO:0006364	rRNA processing	GO:0001228	DNA-binding transcription activator activity, RNA polymerase II-specific	GO:0000408	EKC/KEOPS complex
	35	none	none	none	GO:0050830	defense response to Gram-positive bacterium	GO:0004335	galactokinase activity	GO:0030992	intraciliary transport particle B	GO:0097194	execution phase of apoptosis	GO:0003990	acetylcholinesterase activity	GO:0016020	membrane
					GO:0010172	embryonic body morphogenesis	GO:0004336	galactosylceramidase activity	GO:0008091	spectrin	GO:0030042	actin filament depolymerization	GO:0004104	cholinesterase activity	GO:0017119	Golgi transport complex
DNA repair	36	GSE16975	hydrogen sulfide treated vs. control	-0.17	GO:0006281	DNA repair	GO:0005524	ATP binding	GO:0005634	nucleus	GO:0035279	mRNA cleavage involved in gene silencing by miRNA	GO:0004363	glutathione synthase activity	GO:0031588	nucleotide-activated protein kinase complex
					GO:0006974	cellular response to DNA damage stimulus	GO:0004386	helicase activity	GO:0005694	chromosome	GO:0070922	small RNA loading onto RISC	GO:0016892	endoribonuclease activity, producing 3'-phosphomonoesters	GO:0005730	nucleolus
	37	GSE9246	sir-2 vs. N2 L1	-0.09	GO:0006811	ion transport	GO:0005515	protein binding	GO:0005886	plasma membrane	GO:0040001	establishment of mitotic spindle localization	GO:0000774	adenyl-nucleotide exchange factor activity	GO:0005737	cytoplasm
					GO:0043051	regulation of pharyngeal pumping	GO:0046872	metal ion binding	GO:0030424	axon	GO:0003006	developmental process involved in reproduction	GO:0048027	mRNA 5'-UTR binding	GO:0000235	astral microtubule
GLP-1-dependent genes	38	GSE30505	glp-1 vs. N2 L3	-0.36	GO:0006417	regulation of translation	GO:0003723	RNA binding	GO:0043186	P granule	GO:1901407	regulation of phosphorylation of RNA polymerase II C-terminal domain	GO:0097027	ubiquitin-protein transferase activator activity	GO:0000839	Hrd1p ubiquitin ligase ERAD-L complex
					GO:0007129	synapsis	GO:0003676	nucleic acid binding	GO:0000795	synaptonemal complex	GO:0032786	positive regulation of DNA-templated transcription, elongation	GO:0019239	deaminase activity	GO:0008024	cyclin/CDK positive transcription elongation factor complex
	39	GSE23528	Light-dark entrained 6 hr vs 2 hr	0.09	GO:0045039	protein import into mitochondrial inner membrane	GO:0001054	RNA polymerase I activity	GO:0005758	mitochondrial intermembrane space	GO:0033168	conversion of ds siRNA to ss siRNA involved in RNA interference	GO:0016891	endoribonuclease activity, producing 5'-phosphomonoesters	GO:0030130	clathrin coat of trans-Golgi network vesicle
					GO:0016226	iron-sulfur cluster assembly	GO:0004582	dolichyl-phosphate beta-D-mannosyltransferase activity	GO:0016272	prefoldin complex	GO:0018023	peptidyl-lysine trimethylation	GO:0042284	sphingolipid delta-4 desaturase activity	GO:0016442	RISC complex
	40	GSE11055	24 hrs after hatching in presence vs. absence of food	-0.07	GO:0006811	ion transport	GO:0005216	ion channel activity	GO:0005887	integral component of plasma membrane	GO:0007218	neuropeptide signaling pathway	GO:0004867	serine-type endopeptidase inhibitor activity	GO:0043005	neuron projection
					GO:0007638	mechanosensory behavior	GO:0005267	potassium channel activity	GO:0043005	neuron projection	GO:0007411	axon guidance	GO:0000981	DNA-binding transcription factor activity, RNA polymerase II-specific	GO:0043235	receptor complex
H3K4 trimethylation- dependent genes in germline	41	GSE30505	glp-1; ash-2 vs. glp-1	0.67	GO:0006082	organic acid metabolic process	GO:0030246	carbohydrate binding	GO:0043231	intracellular membrane-bounded organelle	GO:0019547	arginine catabolic process to ornithine	GO:0050480	imidazolonepropionase activity	GO:0016327	apicolateral plasma membrane
					GO:0042738	exogenous drug catabolic process	GO:0016705	oxidoreductase activity, acting on paired donors, with incorporation or reduction of molecular oxygen	GO:0031224	intrinsic component of membrane	GO:0007249	I-kappaB kinase/NF-kappaB signaling	GO:0016716	oxidoreductase activity, acting on paired donors, with incorporation or reduction of molecular oxygen, another compound as one donor, and incorporation of one atom of oxygen	GO:0033162	melanosome membrane
	42	GSE2180	In the dark 46 vs. 26 hrs	0.09	GO:0006357	regulation of transcription by RNA polymerase II	GO:0003677	DNA binding	GO:0005634	nucleus	GO:0008652	cellular amino acid biosynthetic process	GO:0016491	oxidoreductase activity	GO:0005575	cellular_component
					GO:0045944	positive regulation of transcription by RNA polymerase II	GO:0000981	DNA-binding transcription factor activity, RNA polymerase II-specific	GO:0031462	Cul2-RING ubiquitin ligase complex	GO:0009056	catabolic process	GO:0009922	fatty acid elongase activity	GO:0030176	integral component of endoplasmic reticulum membrane
	43	GSE27677	Fasted for 2 days vs. fed	0.07	GO:0050830	defense response to Gram-positive bacterium	GO:0030246	carbohydrate binding	GO:0043231	intracellular membrane-bounded organelle	GO:0045087	innate immune response	GO:0004364	glutathione transferase activity	GO:0005882	intermediate filament
					GO:0045087	innate immune response	GO:0015252	proton channel activity	GO:0031906	late endosome lumen	GO:0006749	glutathione metabolic process	GO:0016298	lipase activity	GO:0005811	lipid droplet
	44	none	none	none	GO:0014056	regulation of acetylcholine secretion, neurotransmission	GO:0016705	oxidoreductase activity, acting on paired donors, with incorporation or reduction of molecular oxygen	GO:0031672	A band	GO:0048557	embryonic digestive tract morphogenesis	GO:0035497	cAMP response element binding	GO:0030014	CCR4-NOT complex
					GO:0014722	regulation of skeletal muscle contraction by calcium ion signaling	GO:0004497	monooxygenase activity	GO:0005883	neurofilament	GO:0003006	developmental process involved in reproduction	GO:0005272	sodium channel activity	GO:0016021	integral component of membrane
Response to heat stress	45	GSE10787	28C heat shock vs. 26C control	-0.18	GO:0036498	IRE1-mediated unfolded protein response	GO:0016746	transferase activity, transferring acyl groups	GO:0005739	mitochondrion	GO:0006606	protein import into nucleus	GO:0003881	CDP-diacylglycerol-inositol 3-phosphatidyltransferase activity	GO:0005634	nucleus
					GO:0030433	ubiquitin-dependent ERAD pathway	GO:0003824	catalytic activity	GO:0005829	cytosol	GO:0061073	ciliary body morphogenesis	GO:0004658	propionyl-CoA carboxylase activity	GO:0030128	clathrin coat of endocytic vesicle
	46	none	none	none	GO:0045944	positive regulation of transcription by RNA polymerase II	GO:0000166	nucleotide binding	GO:0005737	cytoplasm	GO:0015031	protein transport	GO:0003824	catalytic activity	GO:0005737	cytoplasm
					GO:0006935	chemotaxis	GO:0005515	protein binding	GO:0005634	nucleus	GO:0006120	mitochondrial electron transport, NADH to ubiquinone	GO:0000166	nucleotide binding	GO:0005794	Golgi apparatus
Mito UPR (ATFS-1-regulated genes)	47	GSE9967	gas-1 vs. N2	0.43	GO:0055114	oxidation-reduction process	GO:0016491	oxidoreductase activity	GO:0043231	intracellular membrane-bounded organelle	GO:0009410	response to xenobiotic stimulus	GO:0005506	iron ion binding	GO:0043231	intracellular membrane-bounded organelle
					GO:0045087	innate immune response	GO:0008194	UDP-glycosyltransferase activity	GO:0005739	mitochondrion	GO:0006082	organic acid metabolic process	GO:0008395	steroid hydroxylase activity	GO:0005764	lysosome
Propionyl-CoA carboxylase activity	48	GSE43952	pcca-1 vs. N2 fed Comamonas	-0.18	GO:0006470	protein dephosphorylation	GO:0004725	protein tyrosine phosphatase activity	GO:0005856	cytoskeleton	GO:0035335	peptidyl-tyrosine dephosphorylation	GO:0004725	protein tyrosine phosphatase activity	GO:0016021	integral component of membrane
					GO:0035335	peptidyl-tyrosine dephosphorylation	GO:0033149	FFAT motif binding	GO:0031234	extrinsic component of cytoplasmic side of plasma membrane	GO:0008045	motor neuron axon guidance	GO:0004721	phosphoprotein phosphatase activity	GO:0016020	membrane
Translation	49	GSE2180	pie-1; pal-1 vs. pie-1 143 min after 4-cell embryo	-0.3	GO:0006412	translation	GO:0000166	nucleotide binding	GO:0005739	mitochondrion	GO:0000448	cleavage in ITS2 between 5.8S rRNA and LSU-rRNA of tricistronic rRNA transcript (SSU-rRNA, 5.8S rRNA, LSU-rRNA)	GO:0051731	polynucleotide 5'-hydroxyl-kinase activity	GO:0005840	ribosome
					GO:0015986	ATP synthesis coupled proton transport	GO:0046933	proton-transporting ATP synthase activity, rotational mechanism	GO:0005737	cytoplasm	GO:0071569	protein ufmylation	GO:0003735	structural constituent of ribosome	GO:0030286	dynein complex
	50	none	none	none	GO:0006515	protein quality control for misfolded or incompletely synthesized proteins	GO:0000224	peptide-N4-(N-acetyl-beta-glucosaminyl)asparagine amidase activity	GO:0016012	sarcoglycan complex	GO:0050832	defense response to fungus	GO:0004061	arylformamidase activity	GO:1902636	kinociliary basal body
					GO:0006516	glycoprotein catabolic process	GO:0001888	glucuronyl-galactosyl-proteoglycan 4-alpha-N-acetylglucosaminyltransferase activity	GO:0031463	Cul3-RING ubiquitin ligase complex	GO:0007165	signal transduction	GO:0005025	transforming growth factor beta receptor activity, type I	GO:0031528	microvillus membrane
Ribosome biogenesis	51	GSE11055	Fed L1 vs. starved L1	0.28	GO:0006364	rRNA processing	GO:0003723	RNA binding	GO:0005730	nucleolus	GO:0097352	autophagosome maturation	GO:0004512	inositol-3-phosphate synthase activity	GO:0000421	autophagosome membrane
					GO:0042254	ribosome biogenesis	GO:0003735	structural constituent of ribosome	GO:0032040	small-subunit processome	GO:0006995	cellular response to nitrogen starvation	GO:0031625	ubiquitin protein ligase binding	GO:0005776	autophagosome
	52	GSE2180	pie-1; pal-1 vs. pie-1 66 min. after 4-cell embryo	0.18	GO:0045596	negative regulation of cell differentiation	GO:0003676	nucleic acid binding	GO:0005634	nucleus	GO:0042744	hydrogen peroxide catabolic process	GO:0004096	catalase activity	GO:0005634	nucleus
					GO:0000122	negative regulation of transcription by RNA polymerase II	GO:0003723	RNA binding	GO:0030014	CCR4-NOT complex	GO:1903436	regulation of mitotic cytokinetic process	GO:0004407	histone deacetylase activity	GO:0005737	cytoplasm
	53	GSE9485	RNA from neurons vs. RNA from all cells	-0.05	GO:0006952	defense response	GO:0043565	sequence-specific DNA binding	GO:0008076	voltage-gated potassium channel complex	GO:0006935	chemotaxis	GO:0019001	guanyl nucleotide binding	GO:0097730	non-motile cilium
					GO:0061643	chemorepulsion of axon	GO:0051015	actin filament binding	GO:0036194	muscle cell projection	GO:0061065	regulation of dauer larval development	GO:0031683	G-protein beta/gamma-subunit complex binding	GO:0043025	neuronal cell body
	54	none	none	none	GO:0010737	protein kinase A signaling	GO:0016747	transferase activity, transferring acyl groups other than amino-acyl groups	GO:0016021	integral component of membrane	GO:0090325	regulation of locomotion involved in locomotory behavior	GO:0001222	transcription corepressor binding	GO:0030992	intraciliary transport particle B
					GO:0042660	positive regulation of cell fate specification	GO:0031072	heat shock protein binding	GO:0016020	membrane	GO:0061067	negative regulation of dauer larval development	GO:0003883	CTP synthase activity	GO:0097268	cytoophidium
	55	GSE41056	Wild isolate JU1580 vs. N2	0.57	GO:1990169	stress response to copper ion	GO:0052689	carboxylic ester hydrolase activity	GO:0005671	Ada2/Gcn5/Ada3 transcription activator complex	GO:0045087	innate immune response	GO:0008395	steroid hydroxylase activity	GO:0043231	intracellular membrane-bounded organelle
					GO:0006657	CDP-choline pathway	GO:0004103	choline kinase activity	GO:0030015	CCR4-NOT core complex	GO:0006082	organic acid metabolic process	GO:0016712	oxidoreductase activity, acting on paired donors, with incorporation or reduction of molecular oxygen, reduced flavin or flavoprotein as one donor, and incorporation of one atom of oxygen	GO:0000111	nucleotide-excision repair factor 2 complex
	56	none	none	none	GO:0007186	G protein-coupled receptor signaling pathway	GO:0004930	G protein-coupled receptor activity	GO:0016020	membrane	GO:0006900	vesicle budding from membrane	GO:0046872	metal ion binding	GO:0031906	late endosome lumen
					GO:0007606	sensory perception of chemical stimulus	GO:0008324	cation transmembrane transporter activity	GO:0016021	integral component of membrane	GO:0015936	coenzyme A metabolic process	GO:0005546	phosphatidylinositol-4,5-bisphosphate binding	GO:0034777	recycling endosome lumen
	57	none	none	none	GO:0007016	cytoskeletal anchoring at plasma membrane	GO:0008410	CoA-transferase activity	GO:1904115	axon cytoplasm	GO:0006418	tRNA aminoacylation for protein translation	GO:0004812	aminoacyl-tRNA ligase activity	GO:0005751	mitochondrial respiratory chain complex IV
					GO:0051209	release of sequestered calcium ion into cytosol	GO:0005515	protein binding	GO:0005925	focal adhesion	GO:0042660	positive regulation of cell fate specification	GO:0050480	imidazolonepropionase activity	GO:0030014	CCR4-NOT complex
	58	GSE22660	1ug/ml vs. 100ng/ml DMSO	0.1	GO:0006120	mitochondrial electron transport, NADH to ubiquinone	GO:0008137	NADH dehydrogenase (ubiquinone) activity	GO:0005739	mitochondrion	GO:0000027	ribosomal large subunit assembly	GO:0003723	RNA binding	GO:0005840	ribosome
					GO:0008380	RNA splicing	GO:0003735	structural constituent of ribosome	GO:0005747	mitochondrial respiratory chain complex I	GO:0006412	translation	GO:0003735	structural constituent of ribosome	GO:0022625	cytosolic large ribosomal subunit
	59	GSE38196	spg-7 RNAi vs. E.V. in atfs-1 mutants	-0.22	GO:0006508	proteolysis	GO:0030246	carbohydrate binding	GO:0005615	extracellular space	GO:0032259	methylation	GO:0016705	oxidoreductase activity, acting on paired donors, with incorporation or reduction of molecular oxygen	GO:0000015	phosphopyruvate hydratase complex
					GO:0018996	molting cycle, collagen and cuticulin-based cuticle	GO:0016936	galactoside binding	GO:0005576	extracellular region	GO:0055114	oxidation-reduction process	GO:0004497	monooxygenase activity	GO:0033063	Rad51B-Rad51C-Rad51D-XRCC2 complex
	60	none	none	none	GO:0000413	protein peptidyl-prolyl isomerization	GO:0003755	peptidyl-prolyl cis-trans isomerase activity	GO:0005783	endoplasmic reticulum	GO:0009792	embryo development ending in birth or egg hatching	GO:0008137	NADH dehydrogenase (ubiquinone) activity	GO:0005829	cytosol
					GO:0016192	vesicle-mediated transport	GO:0031492	nucleosomal DNA binding	GO:0000786	nucleosome	GO:0006120	mitochondrial electron transport, NADH to ubiquinone	GO:0005515	protein binding	GO:0005747	mitochondrial respiratory chain complex I
	61	GSE12298	fenamiphos vs. untreated	0.09	GO:0050832	defense response to fungus	GO:0005112	Notch binding	GO:0005576	extracellular region	GO:1902600	proton transmembrane transport	GO:0015252	proton channel activity	GO:0044841	gut granule membrane
					GO:0098542	defense response to other organism	GO:0004222	metalloendopeptidase activity	GO:0005615	extracellular space	GO:0045087	innate immune response	GO:0050660	flavin adenine dinucleotide binding	GO:0031090	organelle membrane
	62	none	none	none	GO:0019835	cytolysis	GO:0004364	glutathione transferase activity	GO:0005811	lipid droplet	GO:0038203	TORC2 signaling	GO:0042500	aspartic endopeptidase activity, intramembrane cleaving	GO:0005615	extracellular space
					GO:0042742	defense response to bacterium	GO:0003796	lysozyme activity	GO:0031906	late endosome lumen	GO:0006513	protein monoubiquitination	GO:0005366	myo-inositol:proton symporter activity	GO:0071458	integral component of cytoplasmic side of endoplasmic reticulum membrane
	63	none	none	none	GO:0045824	negative regulation of innate immune response	GO:0004032	alditol:NADP+ 1-oxidoreductase activity	GO:0005623	cell	GO:0055114	oxidation-reduction process	GO:0004497	monooxygenase activity	GO:0033162	melanosome membrane
					GO:0060179	male mating behavior	GO:0008106	alcohol dehydrogenase (NADP+) activity	GO:0034245	mitochondrial DNA-directed RNA polymerase complex	GO:0034314	Arp2/3 complex-mediated actin nucleation	GO:0016491	oxidoreductase activity	GO:0036126	sperm flagellum
Xenobiotic response / response to cadmium	64	GSE42592	cadmium treated vs. untreated	0.62	GO:0045087	innate immune response	GO:0008194	UDP-glycosyltransferase activity	GO:0043231	intracellular membrane-bounded organelle	GO:0006749	glutathione metabolic process	GO:0004364	glutathione transferase activity	GO:0005777	peroxisome
					GO:0036498	IRE1-mediated unfolded protein response	GO:0004497	monooxygenase activity	GO:0005764	lysosome	GO:0009443	pyridoxal 5'-phosphate salvage	GO:0016740	transferase activity	GO:0031224	intrinsic component of membrane
Response to heat and hypoxia (HSPs)	65	GSE47778	daf-16 vs. N2 L1	-0.18	GO:0008340	determination of adult lifespan	GO:0003700	DNA-binding transcription factor activity	GO:0005634	nucleus	GO:0007030	Golgi organization	GO:0005542	folic acid binding	GO:0019008	molybdopterin synthase complex
					GO:0006355	regulation of transcription, DNA-templated	GO:0043565	sequence-specific DNA binding	GO:0000407	phagophore assembly site	GO:0048213	Golgi vesicle prefusion complex stabilization	GO:0016892	endoribonuclease activity, producing 3'-phosphomonoesters	GO:0016442	RISC complex
HIF-1-dependent genes	66	GSE54024	paraquat treated vs. untreated	-0.42	GO:0006470	protein dephosphorylation	GO:0004725	protein tyrosine phosphatase activity	GO:0031234	extrinsic component of cytoplasmic side of plasma membrane	GO:0006515	protein quality control for misfolded or incompletely synthesized proteins	GO:0000224	peptide-N4-(N-acetyl-beta-glucosaminyl)asparagine amidase activity	GO:0005811	lipid droplet
					GO:0018105	peptidyl-serine phosphorylation	GO:0004672	protein kinase activity	GO:0016021	integral component of membrane	GO:0006516	glycoprotein catabolic process	GO:0004031	aldehyde oxidase activity	GO:0005829	cytosol
Genes in sensory neurons (cillium assembly)	67	GSE16050	mir-124 promoter::gfp pos. vs. neg. embryo cells (mir-124 marks sensory neurons)	0.61	GO:1905515	non-motile cilium assembly	GO:0005525	GTP binding	GO:0036064	ciliary basal body	GO:0035025	positive regulation of Rho protein signal transduction	GO:0004181	metallocarboxypeptidase activity	GO:0002102	podosome
					GO:0060271	cilium assembly	GO:0019001	guanyl nucleotide binding	GO:0005929	cilium	GO:0006683	galactosylceramide catabolic process	GO:0004180	carboxypeptidase activity	GO:0036194	muscle cell projection
	68	GSE41366	26 h vs. 20h dichlorvos treatment	0.1	GO:0050830	defense response to Gram-positive bacterium	GO:0030246	carbohydrate binding	GO:0005764	lysosome	GO:0006520	cellular amino acid metabolic process	GO:0004046	aminoacylase activity	GO:0005615	extracellular space
					GO:0006629	lipid metabolic process	GO:0003796	lysozyme activity	GO:0005777	peroxisome	GO:0019346	transsulfuration	GO:0016846	carbon-sulfur lyase activity	GO:0005887	integral component of plasma membrane
	69	GSE2180	pie-1; pal-1 vs. N2 101 min after 4-cell embryo	0.29	GO:0007031	peroxisome organization	GO:0046982	protein heterodimerization activity	GO:0030017	sarcomere	GO:0006511	ubiquitin-dependent protein catabolic process	GO:0004386	helicase activity	GO:0005739	mitochondrion
					GO:0006069	ethanol oxidation	GO:0046872	metal ion binding	GO:0005779	integral component of peroxisomal membrane	GO:0055114	oxidation-reduction process	GO:0031369	translation initiation factor binding	GO:0045263	proton-transporting ATP synthase complex, coupling factor F(o)
	70	GSE41366	dichlorvos treated vs. untreated	0.19	GO:0045944	positive regulation of transcription by RNA polymerase II	GO:0000977	RNA polymerase II regulatory region sequence-specific DNA binding	GO:0005634	nucleus	GO:0050830	defense response to Gram-positive bacterium	GO:0001102	RNA polymerase II activating transcription factor binding	GO:0046930	pore complex
					GO:0006357	regulation of transcription by RNA polymerase II	GO:0000981	DNA-binding transcription factor activity, RNA polymerase II-specific	GO:0005604	basement membrane	GO:0060465	pharynx development	GO:0001228	DNA-binding transcription activator activity, RNA polymerase II-specific	GO:0005777	peroxisome
	71	GSE47778	daf-2; daf-16 vs. daf-16 L1	0.09	GO:0006397	mRNA processing	GO:0005515	protein binding	GO:0005634	nucleus	GO:0006679	glucosylceramide biosynthetic process	GO:0102769	dihydroceramide glucosyltransferase activity	GO:0016021	integral component of membrane
					GO:0042254	ribosome biogenesis	GO:0000166	nucleotide binding	GO:0005737	cytoplasm	GO:0006665	sphingolipid metabolic process	GO:0008120	ceramide glucosyltransferase activity	GO:0016020	membrane
	72	none	none	none	GO:1902600	proton transmembrane transport	GO:0030246	carbohydrate binding	GO:0005887	integral component of plasma membrane	GO:0006629	lipid metabolic process	GO:0005506	iron ion binding	GO:0043231	intracellular membrane-bounded organelle
					GO:0050830	defense response to Gram-positive bacterium	GO:0015252	proton channel activity	GO:0031906	late endosome lumen	GO:0045087	innate immune response	GO:0008395	steroid hydroxylase activity	GO:0070847	core mediator complex
Cell cycle	73	GSE2180	23 vs. 0 min after 4-cell embryo	0.26	GO:0007049	cell cycle	GO:0003723	RNA binding	GO:0005634	nucleus	GO:0005978	glycogen biosynthetic process	GO:0000166	nucleotide binding	GO:0005737	cytoplasm
					GO:0051301	cell division	GO:0003676	nucleic acid binding	GO:0005694	chromosome	GO:0006457	protein folding	GO:0016874	ligase activity	GO:0005739	mitochondrion
	74	GSE32521	gold nanoparticles vs. control	-0.15	GO:0009792	embryo development ending in birth or egg hatching	GO:0005524	ATP binding	GO:0005737	cytoplasm	GO:0042004	feminization of hermaphrodite soma	GO:0004647	phosphoserine phosphatase activity	GO:0016593	Cdc73/Paf1 complex
					GO:0010172	embryonic body morphogenesis	GO:0005515	protein binding	GO:0005913	cell-cell adherens junction	GO:0006513	protein monoubiquitination	GO:0017099	very-long-chain-acyl-CoA dehydrogenase activity	GO:0017119	Golgi transport complex
	75	none	none	none	GO:0050830	defense response to Gram-positive bacterium	GO:0030246	carbohydrate binding	GO:0005746	mitochondrial respiratory chain	GO:0043413	macromolecule glycosylation	GO:0008107	galactoside 2-alpha-L-fucosyltransferase activity	GO:0002144	cytosolic tRNA wobble base thiouridylase complex
					GO:0006097	glyoxylate cycle	GO:0016740	transferase activity	GO:0099572	postsynaptic specialization	GO:0045217	cell-cell junction maintenance	GO:0016757	transferase activity, transferring glycosyl groups	GO:0016021	integral component of membrane
	76	GSE9665	elt-3 vs. control embryo	0.33	GO:0048856	anatomical structure development	GO:0003700	DNA-binding transcription factor activity	GO:0043204	perikaryon	GO:0002119	nematode larval development	GO:0004430	1-phosphatidylinositol 4-kinase activity	GO:0042175	nuclear outer membrane-endoplasmic reticulum membrane network
					GO:0006355	regulation of transcription, DNA-templated	GO:0000977	RNA polymerase II regulatory region sequence-specific DNA binding	GO:0042995	cell projection	GO:0007530	sex determination	GO:0005515	protein binding	GO:0005783	endoplasmic reticulum
	77	GSE28856	4 hr vs. 0 hr after shifting from 17C to 23C	0.33	GO:0015886	heme transport	GO:0015232	heme transporter activity	GO:0043231	intracellular membrane-bounded organelle	GO:0045087	innate immune response	GO:0005506	iron ion binding	GO:0043231	intracellular membrane-bounded organelle
					GO:0006044	N-acetylglucosamine metabolic process	GO:0004705	JUN kinase activity	GO:0005958	DNA-dependent protein kinase-DNA ligase 4 complex	GO:0055114	oxidation-reduction process	GO:0008194	UDP-glycosyltransferase activity	GO:0031260	pseudopodium membrane
Molting	78	GSE47778	daf-2; daf-16 vs. daf-16 L1	-0.47	GO:0006508	proteolysis	GO:0008237	metallopeptidase activity	GO:0005576	extracellular region	GO:0090136	epithelial cell-cell adhesion	GO:0004167	dopachrome isomerase activity	GO:0043235	receptor complex
					GO:0010951	negative regulation of endopeptidase activity	GO:0004867	serine-type endopeptidase inhibitor activity	GO:0005581	collagen trimer	GO:0006814	sodium ion transport	GO:0004714	transmembrane receptor protein tyrosine kinase activity	GO:0005615	extracellular space
	79	GSE35360	humic acid vs. untreated	-0.05	GO:0001514	selenocysteine incorporation	GO:0016874	ligase activity	GO:0005739	mitochondrion	GO:1902895	positive regulation of pri-miRNA transcription by RNA polymerase II	GO:0070037	rRNA (pseudouridine) methyltransferase activity	GO:0005947	mitochondrial alpha-ketoglutarate dehydrogenase complex
					GO:0006310	DNA recombination	GO:0004812	aminoacyl-tRNA ligase activity	GO:0017119	Golgi transport complex	GO:0006850	mitochondrial pyruvate transmembrane transport	GO:0003863	3-methyl-2-oxobutanoate dehydrogenase (2-methylpropanoyl-transferring) activity	GO:0005965	protein farnesyltransferase complex
	80	GSE42192	Fed with Lactobacillus rhamnosus vs. OP50	0.07	GO:0006370	7-methylguanosine mRNA capping	GO:0005515	protein binding	GO:0005634	nucleus	GO:0006874	cellular calcium ion homeostasis	GO:0008934	inositol monophosphate 1-phosphatase activity	GO:0005739	mitochondrion
					GO:0019216	regulation of lipid metabolic process	GO:0046872	metal ion binding	GO:0005737	cytoplasm	GO:0046854	phosphatidylinositol phosphorylation	GO:0015367	oxoglutarate:malate antiporter activity	GO:0000139	Golgi membrane
	81	none	none	none	GO:1905751	positive regulation of endosome to plasma membrane protein transport	GO:0030246	carbohydrate binding	GO:0005737	cytoplasm	GO:0023052	signaling	GO:0003950	NAD+ ADP-ribosyltransferase activity	GO:1990904	ribonucleoprotein complex
					GO:1902647	negative regulation of 1-phosphatidyl-1D-myo-inositol 4,5-bisphosphate biosynthetic process	GO:0004721	phosphoprotein phosphatase activity	GO:0005952	cAMP-dependent protein kinase complex	GO:1904703	negative regulation of protein localization to cell-cell adherens junction	GO:0005366	myo-inositol:proton symporter activity	GO:0097708	intracellular vesicle
	82	GSE23528	Light-dark entrained vs. non-entrained	0.4	GO:0006281	DNA repair	GO:0003676	nucleic acid binding	GO:0005730	nucleolus	GO:0006606	protein import into nucleus	GO:0016277	[myelin basic protein]-arginine N-methyltransferase activity	GO:0031080	nuclear pore outer ring
					GO:0006974	cellular response to DNA damage stimulus	GO:0005484	SNAP receptor activity	GO:0005634	nucleus	GO:0043985	histone H4-R3 methylation	GO:0044020	histone methyltransferase activity (H4-R3 specific)	GO:0031965	nuclear membrane
	83	GSE11055	L1 larvae vs. embryo	0.26	GO:0055114	oxidation-reduction process	GO:0008194	UDP-glycosyltransferase activity	GO:0043231	intracellular membrane-bounded organelle	GO:0006561	proline biosynthetic process	GO:0005112	Notch binding	GO:0005615	extracellular space
					GO:0006081	cellular aldehyde metabolic process	GO:0016491	oxidoreductase activity	GO:0005615	extracellular space	GO:0055129	L-proline biosynthetic process	GO:0004349	glutamate 5-kinase activity	GO:0005783	endoplasmic reticulum
	84	GSE2180	pie-1 41 min vs. 0 min after 4-cell embryo	0.43	GO:0006914	autophagy	GO:0003730	mRNA 3'-UTR binding	GO:0005829	cytosol	GO:0019953	sexual reproduction	GO:0043295	glutathione binding	GO:0005783	endoplasmic reticulum
					GO:0031123	RNA 3'-end processing	GO:0046872	metal ion binding	GO:0005634	nucleus	GO:0045197	establishment or maintenance of epithelial cell apical/basal polarity	GO:0016616	oxidoreductase activity, acting on the CH-OH group of donors, NAD or NADP as acceptor	GO:0005789	endoplasmic reticulum membrane
	85	GSE51691	day 8 hermaphrodites with vs. without males	0.06	GO:0035725	sodium ion transmembrane transport	GO:0008061	chitin binding	GO:0016021	integral component of membrane	GO:0071456	cellular response to hypoxia	GO:0030246	carbohydrate binding	GO:0034663	endoplasmic reticulum chaperone complex
					GO:0071927	octopamine signaling pathway	GO:0102751	UDP-alpha-D-glucose:glucosyl-glycogenin alpha-D-glucosyltransferase activity	GO:0016020	membrane	GO:1903298	negative regulation of hypoxia-induced intrinsic apoptotic signaling pathway	GO:0008117	sphinganine-1-phosphate aldolase activity	GO:0005783	endoplasmic reticulum
	86	GSE38997	L1 vs. L1 + 21 hrs	0.22	GO:0006082	organic acid metabolic process	GO:0008194	UDP-glycosyltransferase activity	GO:0043231	intracellular membrane-bounded organelle	GO:0005975	carbohydrate metabolic process	GO:0030246	carbohydrate binding	GO:0005746	mitochondrial respiratory chain
					GO:0042738	exogenous drug catabolic process	GO:0016758	transferase activity, transferring hexosyl groups	GO:0005667	transcription factor complex	GO:0055085	transmembrane transport	GO:0004784	superoxide dismutase activity	GO:0071821	FANCM-MHF complex
	87	GSE15159	xpa-1 vs. N2	0.06	GO:0007186	G protein-coupled receptor signaling pathway	GO:0042283	dolichyl pyrophosphate Glc1Man9GlcNAc2 alpha-1,3-glucosyltransferase activity	GO:0016021	integral component of membrane	GO:0031344	regulation of cell projection organization	GO:0005242	inward rectifier potassium channel activity	GO:0098839	postsynaptic density membrane
					GO:1903036	positive regulation of response to wounding	GO:0008528	G protein-coupled peptide receptor activity	GO:0016020	membrane	GO:0006811	ion transport	GO:0017016	Ras GTPase binding	GO:0005886	plasma membrane
Proteasome	88	GSE2180	pie-1; pal-1 143 min vs. 0 min after 4-cell embryo	-0.33	GO:0010498	proteasomal protein catabolic process	GO:0004298	threonine-type endopeptidase activity	GO:0000502	proteasome complex	GO:0030242	autophagy of peroxisome	GO:0005515	protein binding	GO:0005737	cytoplasm
					GO:0010499	proteasomal ubiquitin-independent protein catabolic process	GO:0004175	endopeptidase activity	GO:0005839	proteasome core complex	GO:0000045	autophagosome assembly	GO:0008143	poly(A) binding	GO:0005844	polysome
Glucose storage	89	GSE18132	ogt-1 vs. N2	0.54	GO:0045087	innate immune response	GO:0030246	carbohydrate binding	GO:0017119	Golgi transport complex	GO:0005977	glycogen metabolic process	GO:0016829	lyase activity	GO:0044233	Mitochondria-associated ER Membrane
					GO:0034553	mitochondrial respiratory chain complex II assembly	GO:0015250	water channel activity	GO:0005801	cis-Golgi network	GO:1902600	proton transmembrane transport	GO:0016262	protein N-acetylglucosaminyltransferase activity	GO:0005964	phosphorylase kinase complex
	90	none	none	none	GO:0006535	cysteine biosynthetic process from serine	GO:0004124	cysteine synthase activity	GO:0031260	pseudopodium membrane	GO:0001732	formation of cytoplasmic translation initiation complex	GO:0020037	heme binding	GO:0016282	eukaryotic 43S preinitiation complex
					GO:0040015	negative regulation of multicellular organism growth	GO:0009918	sterol delta7 reductase activity	GO:0045252	oxoglutarate dehydrogenase complex	GO:0002183	cytoplasmic translational initiation	GO:0016705	oxidoreductase activity, acting on paired donors, with incorporation or reduction of molecular oxygen	GO:0033290	eukaryotic 48S preinitiation complex
	91	GSE23528	Adults vs. adults 16 hr later	-0.17	GO:0008033	tRNA processing	GO:0008168	methyltransferase activity	GO:0005794	Golgi apparatus	GO:0097484	dendrite extension	GO:0001099	basal RNA polymerase II transcription machinery binding	GO:0005730	nucleolus
					GO:0006506	GPI anchor biosynthetic process	GO:0017176	phosphatidylinositol N-acetylglucosaminyltransferase activity	GO:0005783	endoplasmic reticulum	GO:2000574	regulation of microtubule motor activity	GO:0003723	RNA binding	GO:0033565	ESCRT-0 complex
	92	none	none	none	GO:0016197	endosomal transport	GO:0030151	molybdenum ion binding	GO:0140007	KICSTOR complex	GO:0009584	detection of visible light	GO:0008020	G protein-coupled photoreceptor activity	GO:0016020	membrane
					GO:0006437	tyrosyl-tRNA aminoacylation	GO:0004176	ATP-dependent peptidase activity	GO:0000930	gamma-tubulin complex	GO:0071482	cellular response to light stimulus	GO:0004252	serine-type endopeptidase activity	GO:0016021	integral component of membrane
	93	GSE38997	DNA damage (UVC + EtBr) vs. control	0.17	GO:0042254	ribosome biogenesis	GO:0004812	aminoacyl-tRNA ligase activity	GO:0005730	nucleolus	GO:0055114	oxidation-reduction process	GO:0016491	oxidoreductase activity	GO:0005789	endoplasmic reticulum membrane
					GO:0042273	ribosomal large subunit biogenesis	GO:0000166	nucleotide binding	GO:0030688	preribosome, small subunit precursor	GO:0006631	fatty acid metabolic process	GO:0047617	acyl-CoA hydrolase activity	GO:0005783	endoplasmic reticulum
	94	none	none	none	GO:0019934	cGMP-mediated signaling	GO:0000224	peptide-N4-(N-acetyl-beta-glucosaminyl)asparagine amidase activity	GO:0016020	membrane	GO:0000165	MAPK cascade	GO:0004046	aminoacylase activity	GO:0031499	TRAMP complex
					GO:0006515	protein quality control for misfolded or incompletely synthesized proteins	GO:0008887	glycerate kinase activity	GO:0016021	integral component of membrane	GO:0023014	signal transduction by protein phosphorylation	GO:0008545	JUN kinase kinase activity	GO:0031251	PAN complex
	95	none	none	none	GO:0009410	response to xenobiotic stimulus	GO:0004970	ionotropic glutamate receptor activity	GO:0098839	postsynaptic density membrane	GO:0010035	response to inorganic substance	GO:0004803	transposase activity	GO:0005883	neurofilament
					GO:0035235	ionotropic glutamate receptor signaling pathway	GO:1904315	transmitter-gated ion channel activity involved in regulation of postsynaptic membrane potential	GO:0035060	brahma complex	GO:1902074	response to salt	GO:0015362	high-affinity sodium:dicarboxylate symporter activity	GO:0005964	phosphorylase kinase complex
	96	none	none	none	GO:0008299	isoprenoid biosynthetic process	GO:0008301	DNA binding, bending	GO:0031985	Golgi cisterna	GO:0032511	late endosome to vacuole transport via multivesicular body sorting pathway	GO:0008556	potassium-transporting ATPase activity	GO:0044292	dendrite terminus
					GO:0032482	Rab protein signal transduction	GO:0003924	GTPase activity	GO:0005634	nucleus	GO:0001508	action potential	GO:0005391	sodium:potassium-exchanging ATPase activity	GO:0035869	ciliary transition zone
	97	none	none	none	GO:0043547	positive regulation of GTPase activity	GO:0016740	transferase activity	GO:0005737	cytoplasm	GO:0000398	mRNA splicing, via spliceosome	GO:0003723	RNA binding	GO:1990904	ribonucleoprotein complex
					GO:0038007	netrin-activated signaling pathway	GO:0005524	ATP binding	GO:0005964	phosphorylase kinase complex	GO:0016192	vesicle-mediated transport	GO:0005515	protein binding	GO:0000781	chromosome, telomeric region
	98	none	none	none	GO:1902475	L-alpha-amino acid transmembrane transport	GO:0015179	L-amino acid transmembrane transporter activity	GO:0030016	myofibril	GO:0008406	gonad development	GO:0004222	metalloendopeptidase activity	GO:0043296	apical junction complex
					GO:0043401	steroid hormone mediated signaling pathway	GO:0003707	steroid hormone receptor activity	GO:0097268	cytoophidium	GO:0007275	multicellular organism development	GO:0003863	3-methyl-2-oxobutanoate dehydrogenase (2-methylpropanoyl-transferring) activity	GO:0016324	apical plasma membrane
	99	none	none	none	GO:0048755	branching morphogenesis of a nerve	GO:0000095	S-adenosyl-L-methionine transmembrane transporter activity	GO:0030992	intraciliary transport particle B	GO:0051647	nucleus localization	GO:0017151	DEAD/H-box RNA helicase binding	GO:0005635	nuclear envelope
					GO:0007416	synapse assembly	GO:0001760	aminocarboxymuconate-semialdehyde decarboxylase activity	GO:0005929	cilium	GO:0043666	regulation of phosphoprotein phosphatase activity	GO:0016491	oxidoreductase activity	GO:0140007	KICSTOR complex
Response to fasting and bacteria (hydrolases)	100	GSE9682	Fasted vs. fed	-0.59	GO:0045087	innate immune response	GO:0016787	hydrolase activity	GO:0005764	lysosome	GO:0003333	amino acid transmembrane transport	GO:0015171	amino acid transmembrane transporter activity	GO:0031224	intrinsic component of membrane
					GO:0050830	defense response to Gram-positive bacterium	GO:0030246	carbohydrate binding	GO:0045121	membrane raft	GO:0035725	sodium ion transmembrane transport	GO:0016971	flavin-linked sulfhydryl oxidase activity	GO:0019005	SCF ubiquitin ligase complex
	101	GSE37266	immunostimulatory compound RPW-24 vs. control	0.36	GO:0006082	organic acid metabolic process	GO:0004497	monooxygenase activity	GO:0043231	intracellular membrane-bounded organelle	GO:0035336	long-chain fatty-acyl-CoA metabolic process	GO:0080019	fatty-acyl-CoA reductase (alcohol-forming) activity	GO:0046930	pore complex
					GO:0042738	exogenous drug catabolic process	GO:0016705	oxidoreductase activity, acting on paired donors, with incorporation or reduction of molecular oxygen	GO:0012505	endomembrane system	GO:0009405	pathogenesis	GO:0102965	alcohol-forming fatty acyl-CoA reductase activity	GO:0016235	aggresome
	102	none	none	none	GO:0006182	cGMP biosynthetic process	GO:0004383	guanylate cyclase activity	GO:0016021	integral component of membrane	GO:0060179	male mating behavior	GO:0046983	protein dimerization activity	GO:0098674	extrinsic component of neuronal dense core vesicle membrane
					GO:0009190	cyclic nucleotide biosynthetic process	GO:0016849	phosphorus-oxygen lyase activity	GO:0005764	lysosome	GO:0048666	neuron development	GO:0000981	DNA-binding transcription factor activity, RNA polymerase II-specific	GO:0098894	extrinsic component of presynaptic endocytic zone membrane
Activity of SKN-1 in embryos / oxidation-reduction	103	GSE2180	pie-1 vs. mex-3; skn-1 122 min. after 4-cell embryo (high vs. low skn-1 activity)	0.63	GO:0055114	oxidation-reduction process	GO:0003824	catalytic activity	GO:0005777	peroxisome	GO:0055114	oxidation-reduction process	GO:0016491	oxidoreductase activity	GO:0005623	cell
					GO:0016558	protein import into peroxisome matrix	GO:0016491	oxidoreductase activity	GO:0043231	intracellular membrane-bounded organelle	GO:0010172	embryonic body morphogenesis	GO:0000977	RNA polymerase II regulatory region sequence-specific DNA binding	GO:0005747	mitochondrial respiratory chain complex I
	104	none	none	none	GO:0006182	cGMP biosynthetic process	GO:0004383	guanylate cyclase activity	GO:0005886	plasma membrane	GO:0048268	clathrin coat assembly	GO:0005546	phosphatidylinositol-4,5-bisphosphate binding	GO:0030136	clathrin-coated vesicle
					GO:0009190	cyclic nucleotide biosynthetic process	GO:0016849	phosphorus-oxygen lyase activity	GO:0000164	protein phosphatase type 1 complex	GO:0030150	protein import into mitochondrial matrix	GO:0005543	phospholipid binding	GO:0030479	actin cortical patch
	105	GSE2180	pie-1; pal-1 vs. N2 66 min after 4-cell embryo	-0.09	GO:0055114	oxidation-reduction process	GO:0016491	oxidoreductase activity	GO:0005739	mitochondrion	GO:0007163	establishment or maintenance of cell polarity	GO:0019899	enzyme binding	GO:0005634	nucleus
					GO:0000379	tRNA-type intron splice site recognition and cleavage	GO:0000213	tRNA-intron endonuclease activity	GO:0000214	tRNA-intron endonuclease complex	GO:0019827	stem cell population maintenance	GO:0046872	metal ion binding	GO:0005789	endoplasmic reticulum membrane
	106	none	none	none	GO:0006450	regulation of translational fidelity	GO:0030246	carbohydrate binding	GO:0030956	glutamyl-tRNA(Gln) amidotransferase complex	GO:0006557	S-adenosylmethioninamine biosynthetic process	GO:0051287	NAD binding	GO:0030659	cytoplasmic vesicle membrane
					GO:0007214	gamma-aminobutyric acid signaling pathway	GO:0031177	phosphopantetheine binding	GO:0098794	postsynapse	GO:0006597	spermine biosynthetic process	GO:0016616	oxidoreductase activity, acting on the CH-OH group of donors, NAD or NADP as acceptor	GO:0005829	cytosol
	107	GSE9665	186 min vs. 143 min embryo	-0.44	GO:0006730	one-carbon metabolic process	GO:0061630	ubiquitin protein ligase activity	GO:0016581	NuRD complex	GO:0006891	intra-Golgi vesicle-mediated transport	GO:0008137	NADH dehydrogenase (ubiquinone) activity	GO:0017119	Golgi transport complex
					GO:0016567	protein ubiquitination	GO:0004693	cyclin-dependent protein serine/threonine kinase activity	GO:0000151	ubiquitin ligase complex	GO:0015031	protein transport	GO:0004185	serine-type carboxypeptidase activity	GO:0005794	Golgi apparatus
	108	GSE54513	OMA-1 IP vs. input in a sperm-deficient strain	0.4	GO:0045893	positive regulation of transcription, DNA-templated	GO:0003677	DNA binding	GO:0005634	nucleus	GO:0036498	IRE1-mediated unfolded protein response	GO:0003723	RNA binding	GO:0000502	proteasome complex
					GO:0070986	left/right axis specification	GO:0005515	protein binding	GO:0005789	endoplasmic reticulum membrane	GO:0000184	nuclear-transcribed mRNA catabolic process, nonsense-mediated decay	GO:0000166	nucleotide binding	GO:0005737	cytoplasm
	109	none	none	none	GO:0043401	steroid hormone mediated signaling pathway	GO:0003707	steroid hormone receptor activity	GO:0042720	mitochondrial inner membrane peptidase complex	GO:0030150	protein import into mitochondrial matrix	GO:0008233	peptidase activity	GO:0005744	TIM23 mitochondrial import inner membrane translocase complex
					GO:0048856	anatomical structure development	GO:0008270	zinc ion binding	GO:1902636	kinociliary basal body	GO:0030163	protein catabolic process	GO:0016653	oxidoreductase activity, acting on NAD(P)H, heme protein as acceptor	GO:0005739	mitochondrion
	110	GSE18132	oga-1 vs. N2	-0.1	GO:0033108	mitochondrial respiratory chain complex assembly	GO:0030942	endoplasmic reticulum signal peptide binding	GO:0005739	mitochondrion	GO:0048599	oocyte development	GO:0031404	chloride ion binding	GO:0005773	vacuole
					GO:0055114	oxidation-reduction process	GO:0008312	7S RNA binding	GO:0005743	mitochondrial inner membrane	GO:0006796	phosphate-containing compound metabolic process	GO:0004427	inorganic diphosphatase activity	GO:0099631	postsynaptic endocytic zone cytoplasmic component
	111	GSE11055	S-complete vs. M9	0.1	GO:0010506	regulation of autophagy	GO:0016705	oxidoreductase activity, acting on paired donors, with incorporation or reduction of molecular oxygen	GO:0035658	Mon1-Ccz1 complex	GO:0007419	ventral cord development	GO:0051920	peroxiredoxin activity	GO:0005829	cytosol
					GO:0055114	oxidation-reduction process	GO:0004497	monooxygenase activity	GO:0000015	phosphopyruvate hydratase complex	GO:0006515	protein quality control for misfolded or incompletely synthesized proteins	GO:0016209	antioxidant activity	GO:0045202	synapse
Ribosome biogenesis	112	GSE2180	pie-1; pal-1 vs. pie-1 0 min. after 4-cell embryo	-0.2	GO:0006412	translation	GO:0003735	structural constituent of ribosome	GO:0005840	ribosome	GO:0045899	positive regulation of RNA polymerase II transcriptional preinitiation complex assembly	GO:0005515	protein binding	GO:0000502	proteasome complex
					GO:0002181	cytoplasmic translation	GO:0003723	RNA binding	GO:0022625	cytosolic large ribosomal subunit	GO:0030511	positive regulation of transforming growth factor beta receptor signaling pathway	GO:0001181	RNA polymerase I general transcription initiation factor activity	GO:0008540	proteasome regulatory particle, base subcomplex
	113	none	none	none	GO:0007548	sex differentiation	GO:0016705	oxidoreductase activity, acting on paired donors, with incorporation or reduction of molecular oxygen	GO:0005883	neurofilament	GO:0007157	heterophilic cell-cell adhesion via plasma membrane cell adhesion molecules	GO:0004494	methylmalonyl-CoA mutase activity	GO:0005913	cell-cell adherens junction
					GO:0006837	serotonin transport	GO:0004497	monooxygenase activity	GO:0071683	sensory dendrite	GO:0034769	basement membrane disassembly	GO:0016866	intramolecular transferase activity	GO:0005604	basement membrane
	114	none	none	none	GO:1902075	cellular response to salt	GO:0030976	thiamine pyrophosphate binding	GO:0005832	chaperonin-containing T-complex	GO:0045944	positive regulation of transcription by RNA polymerase II	GO:0001164	RNA polymerase I CORE element sequence-specific DNA binding	GO:0005634	nucleus
					GO:0007635	chemosensory behavior	GO:0008375	acetylglucosaminyltransferase activity	GO:0055120	striated muscle dense body	GO:0006357	regulation of transcription by RNA polymerase II	GO:0061798	GTP 3',8'-cyclase activity	GO:0043229	intracellular organelle
	115	none	none	none	GO:0035721	intraciliary retrograde transport	GO:0001888	glucuronyl-galactosyl-proteoglycan 4-alpha-N-acetylglucosaminyltransferase activity	GO:0030991	intraciliary transport particle A	GO:0015837	amine transport	GO:0016747	transferase activity, transferring acyl groups other than amino-acyl groups	GO:0012505	endomembrane system
					GO:0009269	response to desiccation	GO:0015199	amino-acid betaine transmembrane transporter activity	GO:0005780	extrinsic component of intraperoxisomal membrane	GO:0015874	norepinephrine transport	GO:0004057	arginyltransferase activity	GO:0030673	axolemma
	116	GSE9665	230 min vs. 143 min embryo	-0.32	GO:0006914	autophagy	GO:0097602	cullin family protein binding	GO:0005737	cytoplasm	GO:0008078	mesodermal cell migration	GO:0000981	DNA-binding transcription factor activity, RNA polymerase II-specific	GO:0043296	apical junction complex
					GO:0031146	SCF-dependent proteasomal ubiquitin-dependent protein catabolic process	GO:0061630	ubiquitin protein ligase activity	GO:0019005	SCF ubiquitin ligase complex	GO:0001764	neuron migration	GO:0003700	DNA-binding transcription factor activity	GO:0005667	transcription factor complex
	117	GSE21376	let-418(RNAi) vs. control L1	0.27	GO:0036499	PERK-mediated unfolded protein response	GO:0004046	aminoacylase activity	GO:0005834	heterotrimeric G-protein complex	GO:0055114	oxidation-reduction process	GO:0005506	iron ion binding	GO:0005892	acetylcholine-gated channel complex
					GO:0061817	endoplasmic reticulum-plasma membrane tethering	GO:0016812	hydrolase activity, acting on carbon-nitrogen (but not peptide) bonds, in cyclic amides	GO:0016327	apicolateral plasma membrane	GO:0035264	multicellular organism growth	GO:0016705	oxidoreductase activity, acting on paired donors, with incorporation or reduction of molecular oxygen	GO:0005832	chaperonin-containing T-complex
Xenobiotic response / glutathiones	118	GSE42592	acrylamide treated vs. untreated	0.72	GO:0006749	glutathione metabolic process	GO:0004364	glutathione transferase activity	GO:0043231	intracellular membrane-bounded organelle	GO:0055114	oxidation-reduction process	GO:0016705	oxidoreductase activity, acting on paired donors, with incorporation or reduction of molecular oxygen	GO:0043231	intracellular membrane-bounded organelle
					GO:0055114	oxidation-reduction process	GO:0016491	oxidoreductase activity	GO:0005575	cellular_component	GO:0006082	organic acid metabolic process	GO:0004497	monooxygenase activity	GO:0005811	lipid droplet
	119	GSE21747	albendazole treated vs. control	-0.13	GO:0007606	sensory perception of chemical stimulus	GO:0001222	transcription corepressor binding	GO:0016021	integral component of membrane	GO:0055114	oxidation-reduction process	GO:0001085	RNA polymerase II transcription factor binding	GO:0031902	late endosome membrane
					GO:0007186	G protein-coupled receptor signaling pathway	GO:0004577	N-acetylglucosaminyldiphosphodolichol N-acetylglucosaminyltransferase activity	GO:0016020	membrane	GO:0009410	response to xenobiotic stimulus	GO:0016491	oxidoreductase activity	GO:0005765	lysosomal membrane
	120	GSE35354	quercetin treated vs. control	0.32	GO:0030198	extracellular matrix organization	GO:0042302	structural constituent of cuticle	GO:0005581	collagen trimer	GO:0006814	sodium ion transport	GO:0030246	carbohydrate binding	GO:0043231	intracellular membrane-bounded organelle
					GO:0046487	glyoxylate metabolic process	GO:0004497	monooxygenase activity	GO:0005615	extracellular space	GO:0019835	cytolysis	GO:0016705	oxidoreductase activity, acting on paired donors, with incorporation or reduction of molecular oxygen	GO:0005615	extracellular space
	121	none	none	none	GO:0006099	tricarboxylic acid cycle	GO:0015108	chloride transmembrane transporter activity	GO:0032580	Golgi cisterna membrane	GO:0042981	regulation of apoptotic process	GO:0004315	3-oxoacyl-[acyl-carrier-protein] synthase activity	GO:0031965	nuclear membrane
					GO:0006486	protein glycosylation	GO:0008324	cation transmembrane transporter activity	GO:0030057	desmosome	GO:0032534	regulation of microvillus assembly	GO:0061798	GTP 3',8'-cyclase activity	GO:0000214	tRNA-intron endonuclease complex
	122	GSE23528	Warm-cold entrained vs. non-entrained	0.07	GO:0055085	transmembrane transport	GO:0008194	UDP-glycosyltransferase activity	GO:0016021	integral component of membrane	GO:0019835	cytolysis	GO:0016798	hydrolase activity, acting on glycosyl bonds	GO:0005764	lysosome
					GO:0042908	xenobiotic transport	GO:0016758	transferase activity, transferring hexosyl groups	GO:0016020	membrane	GO:0042742	defense response to bacterium	GO:0003796	lysozyme activity	GO:0031906	late endosome lumen
	123	GSE21591	mRNA unspecifically bound by anti-FLAG antibody	0.12	GO:1905815	regulation of dorsal/ventral axon guidance	GO:0030246	carbohydrate binding	GO:0005764	lysosome	GO:0050982	detection of mechanical stimulus	GO:0003954	NADH dehydrogenase activity	GO:0071683	sensory dendrite
					GO:0051603	proteolysis involved in cellular protein catabolic process	GO:0004197	cysteine-type endopeptidase activity	GO:0005790	smooth endoplasmic reticulum	GO:0023041	neuronal signal transduction	GO:0031491	nucleosome binding	GO:0060170	ciliary membrane
	124	none	none	none	GO:0055085	transmembrane transport	GO:1904680	peptide transmembrane transporter activity	GO:0005604	basement membrane	GO:0034599	cellular response to oxidative stress	GO:0016787	hydrolase activity	GO:0031616	spindle pole centrosome
					GO:0015833	peptide transport	GO:0015333	peptide:proton symporter activity	GO:0016324	apical plasma membrane	GO:0016042	lipid catabolic process	GO:0008233	peptidase activity	GO:0097038	perinuclear endoplasmic reticulum
	125	none	none	none	GO:0006437	tyrosyl-tRNA aminoacylation	GO:0008022	protein C-terminus binding	GO:0005764	lysosome	GO:0006683	galactosylceramide catabolic process	GO:0004336	galactosylceramidase activity	GO:0031332	RNAi effector complex
					GO:0009395	phospholipid catabolic process	GO:0004831	tyrosine-tRNA ligase activity	GO:0043226	organelle	GO:0043330	response to exogenous dsRNA	GO:0005229	intracellular calcium activated chloride channel activity	GO:0005744	TIM23 mitochondrial import inner membrane translocase complex
	126	GSE35360	humic acid vs. untreated	-0.06	GO:0007275	multicellular organism development	GO:0005515	protein binding	GO:0005737	cytoplasm	GO:0045128	negative regulation of reciprocal meiotic recombination	GO:0019901	protein kinase binding	GO:0016460	myosin II complex
					GO:0009792	embryo development ending in birth or egg hatching	GO:0000166	nucleotide binding	GO:0031965	nuclear membrane	GO:0048213	Golgi vesicle prefusion complex stabilization	GO:0000146	microfilament motor activity	GO:0070938	contractile ring
	127	none	none	none	GO:0009952	anterior/posterior pattern specification	GO:0015267	channel activity	GO:0005938	cell cortex	GO:0023052	signaling	GO:0005220	inositol 1,4,5-trisphosphate-sensitive calcium-release channel activity	GO:0030667	secretory granule membrane
					GO:0040001	establishment of mitotic spindle localization	GO:0008022	protein C-terminus binding	GO:0030690	Noc1p-Noc2p complex	GO:0042713	sperm ejaculation	GO:0008511	sodium:potassium:chloride symporter activity	GO:0030175	filopodium
	128	none	none	none	GO:0006635	fatty acid beta-oxidation	GO:0003985	acetyl-CoA C-acetyltransferase activity	GO:0016507	mitochondrial fatty acid beta-oxidation multienzyme complex	GO:0008643	carbohydrate transport	GO:0051119	sugar transmembrane transporter activity	GO:0000214	tRNA-intron endonuclease complex
					GO:0030866	cortical actin cytoskeleton organization	GO:0003988	acetyl-CoA C-acyltransferase activity	GO:0031209	SCAR complex	GO:0009086	methionine biosynthetic process	GO:0047617	acyl-CoA hydrolase activity	GO:0071564	npBAF complex
	129	none	none	none	GO:0007010	cytoskeleton organization	GO:0017112	Rab guanyl-nucleotide exchange factor activity	GO:0005881	cytoplasmic microtubule	GO:0042059	negative regulation of epidermal growth factor receptor signaling pathway	GO:0008234	cysteine-type peptidase activity	GO:0001726	ruffle
					GO:0006997	nucleus organization	GO:0005267	potassium channel activity	GO:0000235	astral microtubule	GO:0072327	vulval cell fate specification	GO:0004176	ATP-dependent peptidase activity	GO:0009368	endopeptidase Clp complex
	130	GSE23843	mRNA co-IPed with GLD-2	-0.12	GO:0006355	regulation of transcription, DNA-templated	GO:0043565	sequence-specific DNA binding	GO:0016021	integral component of membrane	GO:1903356	positive regulation of distal tip cell migration	GO:0004535	poly(A)-specific ribonuclease activity	GO:0005737	cytoplasm
					GO:0043401	steroid hormone mediated signaling pathway	GO:0003700	DNA-binding transcription factor activity	GO:0016020	membrane	GO:0000289	nuclear-transcribed mRNA poly(A) tail shortening	GO:0030695	GTPase regulator activity	GO:0005739	mitochondrion
	131	none	none	none	GO:0098609	cell-cell adhesion	GO:0008022	protein C-terminus binding	GO:0008623	CHRAC	GO:1902474	positive regulation of protein localization to synapse	GO:0048365	Rac GTPase binding	GO:0070382	exocytic vesicle
					GO:0007016	cytoskeletal anchoring at plasma membrane	GO:0005347	ATP transmembrane transporter activity	GO:0016590	ACF complex	GO:0008045	motor neuron axon guidance	GO:0015179	L-amino acid transmembrane transporter activity	GO:0005929	cilium
	132	none	none	none	GO:0019430	removal of superoxide radicals	GO:0016757	transferase activity, transferring glycosyl groups	GO:0016021	integral component of membrane	GO:0043113	receptor clustering	GO:0003727	single-stranded RNA binding	GO:0016607	nuclear speck
					GO:0043413	macromolecule glycosylation	GO:0004784	superoxide dismutase activity	GO:0016020	membrane	GO:0045664	regulation of neuron differentiation	GO:0002162	dystroglycan binding	GO:0048786	presynaptic active zone
	133	GSE9897	mev-1 vs. N2	0.12	GO:0006515	protein quality control for misfolded or incompletely synthesized proteins	GO:0000224	peptide-N4-(N-acetyl-beta-glucosaminyl)asparagine amidase activity	GO:0016324	apical plasma membrane	GO:0005998	xylulose catabolic process	GO:0005347	ATP transmembrane transporter activity	GO:0099523	presynaptic cytosol
					GO:0006516	glycoprotein catabolic process	GO:0001760	aminocarboxymuconate-semialdehyde decarboxylase activity	GO:0098592	cytoplasmic side of apical plasma membrane	GO:0042732	D-xylose metabolic process	GO:0008903	hydroxypyruvate isomerase activity	GO:0032584	growth cone membrane
	134	GSE8004	larval vs. embryonic neurons	-0.4	GO:0006749	glutathione metabolic process	GO:0004364	glutathione transferase activity	GO:0005968	Rab-protein geranylgeranyltransferase complex	GO:0070125	mitochondrial translational elongation	GO:0003746	translation elongation factor activity	GO:0044853	plasma membrane raft
					GO:0042256	mature ribosome assembly	GO:0008429	phosphatidylethanolamine binding	GO:0005771	multivesicular body	GO:0034599	cellular response to oxidative stress	GO:0004647	phosphoserine phosphatase activity	GO:0009331	glycerol-3-phosphate dehydrogenase complex
	135	GSE52064	mes-4 vs. N2 dissected germline	0.59	GO:0016192	vesicle-mediated transport	GO:0005096	GTPase activator activity	GO:0005783	endoplasmic reticulum	GO:0006116	NADH oxidation	GO:0003824	catalytic activity	GO:0016507	mitochondrial fatty acid beta-oxidation multienzyme complex
					GO:0043547	positive regulation of GTPase activity	GO:0017137	Rab GTPase binding	GO:0005794	Golgi apparatus	GO:0006564	L-serine biosynthetic process	GO:0004647	phosphoserine phosphatase activity	GO:0009331	glycerol-3-phosphate dehydrogenase complex
	136	none	none	none	GO:0035262	gonad morphogenesis	GO:0042393	histone binding	GO:0005737	cytoplasm	GO:0019835	cytolysis	GO:0003796	lysozyme activity	GO:0005764	lysosome
					GO:0006413	translational initiation	GO:0003743	translation initiation factor activity	GO:0016282	eukaryotic 43S preinitiation complex	GO:0050830	defense response to Gram-positive bacterium	GO:0003779	actin binding	GO:0031906	late endosome lumen
	137	none	none	none	GO:0045087	innate immune response	GO:0030246	carbohydrate binding	GO:0043231	intracellular membrane-bounded organelle	GO:0055114	oxidation-reduction process	GO:0016491	oxidoreductase activity	GO:0043231	intracellular membrane-bounded organelle
					GO:0050830	defense response to Gram-positive bacterium	GO:0004497	monooxygenase activity	GO:0005782	peroxisomal matrix	GO:0006665	sphingolipid metabolic process	GO:0004348	glucosylceramidase activity	GO:0016235	aggresome
	138	none	none	none	GO:0006355	regulation of transcription, DNA-templated	GO:0000224	peptide-N4-(N-acetyl-beta-glucosaminyl)asparagine amidase activity	GO:0098894	extrinsic component of presynaptic endocytic zone membrane	GO:0032237	activation of store-operated calcium channel activity	GO:0005483	soluble NSF attachment protein activity	GO:1902554	serine/threonine protein kinase complex
					GO:0006515	protein quality control for misfolded or incompletely synthesized proteins	GO:0003700	DNA-binding transcription factor activity	GO:0045211	postsynaptic membrane	GO:1901341	positive regulation of store-operated calcium channel activity	GO:0030215	semaphorin receptor binding	GO:0005774	vacuolar membrane
	139	GSE36358	microgravity vs. control	0.16	GO:0007168	receptor guanylyl cyclase signaling pathway	GO:0001653	peptide receptor activity	GO:0005887	integral component of plasma membrane	GO:0007165	signal transduction	GO:0035596	methylthiotransferase activity	GO:0005764	lysosome
					GO:0006182	cGMP biosynthetic process	GO:0004383	guanylate cyclase activity	GO:0016020	membrane	GO:0051603	proteolysis involved in cellular protein catabolic process	GO:0051539	4 iron, 4 sulfur cluster binding	GO:0043231	intracellular membrane-bounded organelle
Muscle contraction / Acetylcholinesterase activity	140	GSE41366	dichlorvos treated vs. untreated	0.38	GO:0060298	positive regulation of sarcomere organization	GO:0051015	actin filament binding	GO:0031430	M band	GO:0006629	lipid metabolic process	GO:0016787	hydrolase activity	GO:0055120	striated muscle dense body
					GO:0007229	integrin-mediated signaling pathway	GO:0003779	actin binding	GO:0055120	striated muscle dense body	GO:0016042	lipid catabolic process	GO:0003837	beta-ureidopropionase activity	GO:0005576	extracellular region
	141	GSE8231	hlh-1 embryos with vs. without heat shock	0.52	GO:0007517	muscle organ development	GO:0005509	calcium ion binding	GO:0016012	sarcoglycan complex	GO:0045944	positive regulation of transcription by RNA polymerase II	GO:0000978	RNA polymerase II proximal promoter sequence-specific DNA binding	GO:0009368	endopeptidase Clp complex
					GO:0006937	regulation of muscle contraction	GO:0046983	protein dimerization activity	GO:0055120	striated muscle dense body	GO:0009786	regulation of asymmetric cell division	GO:0051213	dioxygenase activity	GO:0005779	integral component of peroxisomal membrane
	142	none	none	none	GO:0006749	glutathione metabolic process	GO:0004364	glutathione transferase activity	GO:0099572	postsynaptic specialization	GO:1900038	negative regulation of cellular response to hypoxia	GO:0004499	N,N-dimethylaniline monooxygenase activity	GO:0005789	endoplasmic reticulum membrane
					GO:0006843	mitochondrial citrate transmembrane transport	GO:0008482	sulfite oxidase activity	GO:0099634	postsynaptic specialization membrane	GO:0030968	endoplasmic reticulum unfolded protein response	GO:0050661	NADP binding	GO:0031090	organelle membrane
	143	GSE9897	ubiquinone RNAi vs. control	-0.05	GO:0035066	positive regulation of histone acetylation	GO:0004367	glycerol-3-phosphate dehydrogenase [NAD+] activity	GO:0070531	BRCA1-A complex	GO:0016579	protein deubiquitination	GO:0036459	thiol-dependent ubiquitinyl hydrolase activity	GO:0043231	intracellular membrane-bounded organelle
					GO:0006116	NADH oxidation	GO:0000774	adenyl-nucleotide exchange factor activity	GO:0031436	BRCA1-BARD1 complex	GO:0006749	glutathione metabolic process	GO:0004843	thiol-dependent ubiquitin-specific protease activity	GO:0016021	integral component of membrane
Genes in muscle cells / ion transport	144	GSE8462	embryonic muscle vs. all cells	0.47	GO:0006811	ion transport	GO:0005216	ion channel activity	GO:0055120	striated muscle dense body	GO:0043069	negative regulation of programmed cell death	GO:0005198	structural molecule activity	GO:0099631	postsynaptic endocytic zone cytoplasmic component
					GO:0034220	ion transmembrane transport	GO:0005230	extracellular ligand-gated ion channel activity	GO:0005886	plasma membrane	GO:0048268	clathrin coat assembly	GO:0031177	phosphopantetheine binding	GO:0030125	clathrin vesicle coat
	145	GSE23528	adult vs. adult 22 hr later	-0.08	GO:1903438	positive regulation of mitotic cytokinetic process	GO:0005515	protein binding	GO:0005634	nucleus	GO:0036498	IRE1-mediated unfolded protein response	GO:0005262	calcium channel activity	GO:0005739	mitochondrion
					GO:0040027	negative regulation of vulval development	GO:0003713	transcription coactivator activity	GO:0005737	cytoplasm	GO:0006816	calcium ion transport	GO:0008324	cation transmembrane transporter activity	GO:0005783	endoplasmic reticulum
Genes that change with age / collagens	146	GSE42192	aging (10 d adult vs. 3 day adult)	-0.45	GO:0055085	transmembrane transport	GO:0042302	structural constituent of cuticle	GO:0005581	collagen trimer	GO:0001732	formation of cytoplasmic translation initiation complex	GO:0004788	thiamine diphosphokinase activity	GO:0005615	extracellular space
					GO:0006548	histidine catabolic process	GO:0015078	proton transmembrane transporter activity	GO:0016471	vacuolar proton-transporting V-type ATPase complex	GO:0002183	cytoplasmic translational initiation	GO:0008276	protein methyltransferase activity	GO:0016282	eukaryotic 43S preinitiation complex
	147	GSE34471	hrg-2 vs. N2	0.07	GO:0015866	ADP transport	GO:0005471	ATP:ADP antiporter activity	GO:0000786	nucleosome	GO:0016310	phosphorylation	GO:0004687	myosin light chain kinase activity	GO:0031234	extrinsic component of cytoplasmic side of plasma membrane
					GO:0015867	ATP transport	GO:0004721	phosphoprotein phosphatase activity	GO:0031234	extrinsic component of cytoplasmic side of plasma membrane	GO:0006468	protein phosphorylation	GO:0050277	sedoheptulokinase activity	GO:0005737	cytoplasm
Respiration	148	GSE2180	pie-1 vs. N2 122 min after 4-cell embryo	0.07	GO:0009060	aerobic respiration	GO:0015078	proton transmembrane transporter activity	GO:0070469	respiratory chain	GO:0006427	histidyl-tRNA aminoacylation	GO:0004821	histidine-tRNA ligase activity	GO:0005788	endoplasmic reticulum lumen
					GO:1902600	proton transmembrane transport	GO:0004129	cytochrome-c oxidase activity	GO:0005743	mitochondrial inner membrane	GO:0006900	vesicle budding from membrane	GO:0046872	metal ion binding	GO:0098830	presynaptic endosome
Response to fasting	149	GSE27677	Fasted vs. fed	0.36	GO:0006082	organic acid metabolic process	GO:0004497	monooxygenase activity	GO:0043231	intracellular membrane-bounded organelle	GO:0055085	transmembrane transport	GO:0030170	pyridoxal phosphate binding	GO:0016324	apical plasma membrane
					GO:0042738	exogenous drug catabolic process	GO:0008194	UDP-glycosyltransferase activity	GO:0016021	integral component of membrane	GO:0051453	regulation of intracellular pH	GO:0003824	catalytic activity	GO:0005960	glycine cleavage complex
	150	none	none	none	GO:0006644	phospholipid metabolic process	GO:0008194	UDP-glycosyltransferase activity	GO:0043231	intracellular membrane-bounded organelle	GO:0009410	response to xenobiotic stimulus	GO:0005506	iron ion binding	GO:0043231	intracellular membrane-bounded organelle
					GO:0055114	oxidation-reduction process	GO:0016758	transferase activity, transferring hexosyl groups	GO:0005780	extrinsic component of intraperoxisomal membrane	GO:0006082	organic acid metabolic process	GO:0008395	steroid hydroxylase activity	GO:0031674	I band
Molting	151	GSE47778	daf-2 vs. daf-2; daf-16 L1 under UV stress	-0.47	GO:0042338	cuticle development involved in collagen and cuticulin-based cuticle molting cycle	GO:0042329	structural constituent of collagen and cuticulin-based cuticle	GO:0005576	extracellular region	GO:0008283	cell proliferation	GO:0004181	metallocarboxypeptidase activity	GO:0005615	extracellular space
					GO:0018996	molting cycle, collagen and cuticulin-based cuticle	GO:0004867	serine-type endopeptidase inhibitor activity	GO:0005788	endoplasmic reticulum lumen	GO:0019442	tryptophan catabolic process to acetyl-CoA	GO:0004833	tryptophan 2,3-dioxygenase activity	GO:0098733	hemidesmosome associated protein complex
	152	none	none	none	GO:0032024	positive regulation of insulin secretion	GO:0004952	dopamine neurotransmitter receptor activity	GO:0016328	lateral plasma membrane	GO:0002804	positive regulation of antifungal peptide production	GO:0038023	signaling receptor activity	GO:0048179	activin receptor complex
					GO:0034058	endosomal vesicle fusion	GO:0008440	inositol-1,4,5-trisphosphate 3-kinase activity	GO:0043529	GET complex	GO:0007185	transmembrane receptor protein tyrosine phosphatase signaling pathway	GO:0004363	glutathione synthase activity	GO:0044840	gut granule
LIN-35-dependent genes	153	GSE6547	lin-35 vs. N2	0.35	GO:0090305	nucleic acid phosphodiester bond hydrolysis	GO:0046589	ribonuclease T1 activity	GO:0000776	kinetochore	GO:0009247	glycolipid biosynthetic process	GO:0016747	transferase activity, transferring acyl groups other than amino-acyl groups	GO:0031224	intrinsic component of membrane
					GO:0051301	cell division	GO:0004518	nuclease activity	GO:0000777	condensed chromosome kinetochore	GO:0010447	response to acidic pH	GO:0001012	RNA polymerase II regulatory region DNA binding	GO:0017119	Golgi transport complex
	154	GSE5793	8hr vs. 4hr Pseudomonas infection	0.19	GO:0015671	oxygen transport	GO:0030246	carbohydrate binding	GO:0005794	Golgi apparatus	GO:0010644	cell communication by electrical coupling	GO:1903763	gap junction channel activity involved in cell communication by electrical coupling	GO:0099503	secretory vesicle
					GO:0050650	chondroitin sulfate proteoglycan biosynthetic process	GO:0008375	acetylglucosaminyltransferase activity	GO:0043195	terminal bouton	GO:0031283	negative regulation of guanylate cyclase activity	GO:0003923	GPI-anchor transamidase activity	GO:0042765	GPI-anchor transamidase complex
	155	none	none	none	GO:0009653	anatomical structure morphogenesis	GO:0000981	DNA-binding transcription factor activity, RNA polymerase II-specific	GO:1902636	kinociliary basal body	GO:0009408	response to heat	GO:0046872	metal ion binding	GO:0005623	cell
					GO:0006777	Mo-molybdopterin cofactor biosynthetic process	GO:0015929	hexosaminidase activity	GO:0005851	eukaryotic translation initiation factor 2B complex	GO:0006986	response to unfolded protein	GO:0001164	RNA polymerase I CORE element sequence-specific DNA binding	GO:0005668	RNA polymerase transcription factor SL1 complex
	156	GSE42592	mercury treated vs. control	0.31	GO:0045087	innate immune response	GO:0016747	transferase activity, transferring acyl groups other than amino-acyl groups	GO:0045121	membrane raft	GO:0055085	transmembrane transport	GO:0022857	transmembrane transporter activity	GO:0005777	peroxisome
					GO:0036498	IRE1-mediated unfolded protein response	GO:0008270	zinc ion binding	GO:0055120	striated muscle dense body	GO:0007586	digestion	GO:0005506	iron ion binding	GO:0031906	late endosome lumen
	157	GSE38997	EtBr treated vs. unctreated	-0.09	GO:0006886	intracellular protein transport	GO:0005525	GTP binding	GO:0005789	endoplasmic reticulum membrane	GO:0006120	mitochondrial electron transport, NADH to ubiquinone	GO:0043295	glutathione binding	GO:0005747	mitochondrial respiratory chain complex I
					GO:0015031	protein transport	GO:0003924	GTPase activity	GO:0005783	endoplasmic reticulum	GO:0006614	SRP-dependent cotranslational protein targeting to membrane	GO:0030942	endoplasmic reticulum signal peptide binding	GO:0005739	mitochondrion
	158	GSE38997	EtBr treated vs. unctreated	0.27	GO:0006082	organic acid metabolic process	GO:0008395	steroid hydroxylase activity	GO:0043231	intracellular membrane-bounded organelle	GO:0006082	organic acid metabolic process	GO:0016705	oxidoreductase activity, acting on paired donors, with incorporation or reduction of molecular oxygen	GO:0031143	pseudopodium
					GO:0042738	exogenous drug catabolic process	GO:0016712	oxidoreductase activity, acting on paired donors, with incorporation or reduction of molecular oxygen, reduced flavin or flavoprotein as one donor, and incorporation of one atom of oxygen	GO:0031906	late endosome lumen	GO:0042738	exogenous drug catabolic process	GO:0004497	monooxygenase activity	GO:0043231	intracellular membrane-bounded organelle
Neuronal genes	159	GSE8004	RNA from neurons vs. RNA from all cells in embryos	-0.35	GO:0009263	deoxyribonucleotide biosynthetic process	GO:0004748	ribonucleoside-diphosphate reductase activity, thioredoxin disulfide as acceptor	GO:0071008	U2-type post-mRNA release spliceosomal complex	GO:0019509	L-methionine salvage from methylthioadenosine	GO:0004647	phosphoserine phosphatase activity	GO:0005575	cellular_component
					GO:0000079	regulation of cyclin-dependent protein serine/threonine kinase activity	GO:0016538	cyclin-dependent protein serine/threonine kinase regulator activity	GO:0000307	cyclin-dependent protein kinase holoenzyme complex	GO:0006564	L-serine biosynthetic process	GO:0017061	S-methyl-5-thioadenosine phosphorylase activity	GO:0044297	cell body
	160	GSE38997	EtBr treated 24 h vs 4 hr	0.05	GO:0055085	transmembrane transport	GO:0015020	glucuronosyltransferase activity	GO:0043231	intracellular membrane-bounded organelle	GO:0045087	innate immune response	GO:0005385	zinc ion transmembrane transporter activity	GO:0043231	intracellular membrane-bounded organelle
					GO:0006857	oligopeptide transport	GO:0004497	monooxygenase activity	GO:0005764	lysosome	GO:0050830	defense response to Gram-positive bacterium	GO:0020037	heme binding	GO:0044840	gut granule
	161	GSE15527	sma-6 vs. dbl-1	-0.13	GO:0055085	transmembrane transport	GO:0022857	transmembrane transporter activity	GO:0016021	integral component of membrane	GO:0045087	innate immune response	GO:0003796	lysozyme activity	GO:0046930	pore complex
					GO:0055114	oxidation-reduction process	GO:0016491	oxidoreductase activity	GO:0016020	membrane	GO:0019835	cytolysis	GO:0070513	death domain binding	GO:0043231	intracellular membrane-bounded organelle
	162	GSE15159	xpa-1 vs. N2	0.14	GO:0007186	G protein-coupled receptor signaling pathway	GO:0038022	G protein-coupled olfactory receptor activity	GO:0016021	integral component of membrane	GO:0007368	determination of left/right symmetry	GO:0042302	structural constituent of cuticle	GO:0005813	centrosome
					GO:0050911	detection of chemical stimulus involved in sensory perception of smell	GO:0008528	G protein-coupled peptide receptor activity	GO:0016020	membrane	GO:0003388	neuron development involved in amphid sensory organ development	GO:0008420	RNA polymerase II CTD heptapeptide repeat phosphatase activity	GO:0005581	collagen trimer
	163	GSE35360	humic acid vs. untreated	-0.28	GO:0051301	cell division	GO:0000166	nucleotide binding	GO:0005737	cytoplasm	GO:0017148	negative regulation of translation	GO:0003723	RNA binding	GO:0030659	cytoplasmic vesicle membrane
					GO:0007049	cell cycle	GO:0005524	ATP binding	GO:0000145	exocyst	GO:0000454	snoRNA guided rRNA pseudouridine synthesis	GO:0003676	nucleic acid binding	GO:0005737	cytoplasm
	164	none	none	none	GO:0035973	aggrephagy	GO:0015095	magnesium ion transmembrane transporter activity	GO:0090575	RNA polymerase II transcription factor complex	GO:0016579	protein deubiquitination	GO:0036459	thiol-dependent ubiquitinyl hydrolase activity	GO:0009368	endopeptidase Clp complex
					GO:0007411	axon guidance	GO:0000981	DNA-binding transcription factor activity, RNA polymerase II-specific	GO:0016021	integral component of membrane	GO:0001845	phagolysosome assembly	GO:0008233	peptidase activity	GO:0043541	UDP-N-acetylglucosamine transferase complex
	165	none	none	none	GO:0009566	fertilization	GO:0030246	carbohydrate binding	GO:1902636	kinociliary basal body	GO:0050907	detection of chemical stimulus involved in sensory perception	GO:0004984	olfactory receptor activity	GO:0098894	extrinsic component of presynaptic endocytic zone membrane
					GO:0010470	regulation of gastrulation	GO:0031208	POZ domain binding	GO:0022626	cytosolic ribosome	GO:0006480	N-terminal protein amino acid methylation	GO:0004420	hydroxymethylglutaryl-CoA reductase (NADPH) activity	GO:0099738	cell cortex region
	166	none	none	none	GO:0030951	establishment or maintenance of microtubule cytoskeleton polarity	GO:0008270	zinc ion binding	GO:0097179	protease inhibitor complex	GO:0040028	regulation of vulval development	GO:0043565	sequence-specific DNA binding	GO:0005925	focal adhesion
					GO:0007169	transmembrane receptor protein tyrosine kinase signaling pathway	GO:0008234	cysteine-type peptidase activity	GO:0098830	presynaptic endosome	GO:0030154	cell differentiation	GO:0003700	DNA-binding transcription factor activity	GO:0030122	AP-2 adaptor complex
	167	GSE8696	high vs. low hemin (heme)	-0.11	GO:0030198	extracellular matrix organization	GO:0042302	structural constituent of cuticle	GO:0016021	integral component of membrane	GO:0043413	macromolecule glycosylation	GO:0008107	galactoside 2-alpha-L-fucosyltransferase activity	GO:0031253	cell projection membrane
					GO:0043413	macromolecule glycosylation	GO:0016757	transferase activity, transferring glycosyl groups	GO:0005615	extracellular space	GO:0036065	fucosylation	GO:0061598	molybdopterin adenylyltransferase activity	GO:0099572	postsynaptic specialization
	168	none	none	none	GO:0048856	anatomical structure development	GO:0043565	sequence-specific DNA binding	GO:0030175	filopodium	GO:0007268	chemical synaptic transmission	GO:0005516	calmodulin binding	GO:0005887	integral component of plasma membrane
					GO:0001666	response to hypoxia	GO:0003700	DNA-binding transcription factor activity	GO:0016021	integral component of membrane	GO:0045747	positive regulation of Notch signaling pathway	GO:0004683	calmodulin-dependent protein kinase activity	GO:0043005	neuron projection
HIF-1-dependent genes	169	GSE42192	Fed with Lactobacillus rhamnosus vs. OP50	0.55	GO:0018105	peptidyl-serine phosphorylation	GO:0004674	protein serine/threonine kinase activity	GO:0031143	pseudopodium	GO:0009405	pathogenesis	GO:0004563	beta-N-acetylhexosaminidase activity	GO:0046930	pore complex
					GO:0007060	male meiosis chromosome segregation	GO:0004721	phosphoprotein phosphatase activity	GO:0005856	cytoskeleton	GO:0035915	pore formation in membrane of other organism	GO:0102148	N-acetyl-beta-D-galactosaminidase activity	GO:0005861	troponin complex
	170	GSE41366	14 h vs. 2 h dichlorvos treatment	0.15	GO:0055085	transmembrane transport	GO:0042302	structural constituent of cuticle	GO:0005576	extracellular region	GO:1990179	protein localization to actomyosin contractile ring	GO:0004867	serine-type endopeptidase inhibitor activity	GO:0030017	sarcomere
					GO:0006520	cellular amino acid metabolic process	GO:0004046	aminoacylase activity	GO:0042600	chorion	GO:0001764	neuron migration	GO:0061598	molybdopterin adenylyltransferase activity	GO:0099572	postsynaptic specialization
DAF-16-dependent genes	171	GSE27677	daf-16 vs. N2	-0.33	GO:0055114	oxidation-reduction process	GO:0020037	heme binding	GO:0005777	peroxisome	GO:0006520	cellular amino acid metabolic process	GO:0004046	aminoacylase activity	GO:0031231	intrinsic component of peroxisomal membrane
					GO:0006749	glutathione metabolic process	GO:0005506	iron ion binding	GO:0005739	mitochondrion	GO:0044255	cellular lipid metabolic process	GO:0071949	FAD binding	GO:0005604	basement membrane
	172	none	none	none	GO:0007517	muscle organ development	GO:0015020	glucuronosyltransferase activity	GO:0031476	myosin VI complex	GO:0046328	regulation of JNK cascade	GO:0003714	transcription corepressor activity	GO:0030686	90S preribosome
					GO:0032774	RNA biosynthetic process	GO:0008237	metallopeptidase activity	GO:0016459	myosin complex	GO:1901098	positive regulation of autophagosome maturation	GO:0016312	inositol bisphosphate phosphatase activity	GO:0016580	Sin3 complex
	173	GSE9665	tbx-8,9 vs. control embryo	-0.58	GO:0006506	GPI anchor biosynthetic process	GO:0004362	glutathione-disulfide reductase activity	GO:0005739	mitochondrion	GO:0006012	galactose metabolic process	GO:0003743	translation initiation factor activity	GO:0005634	nucleus
					GO:0006102	isocitrate metabolic process	GO:0004430	1-phosphatidylinositol 4-kinase activity	GO:0033180	proton-transporting V-type ATPase, V1 domain	GO:0033499	galactose catabolic process via UDP-galactose	GO:0005515	protein binding	GO:0005813	centrosome
	174	GSE9665	pal-1 vs. control embryo	-0.52	GO:1905485	positive regulation of motor neuron migration	GO:0030971	receptor tyrosine kinase binding	GO:0062023	collagen-containing extracellular matrix	GO:0006357	regulation of transcription by RNA polymerase II	GO:0000977	RNA polymerase II regulatory region sequence-specific DNA binding	GO:0035371	microtubule plus-end
					GO:0016055	Wnt signaling pathway	GO:0017147	Wnt-protein binding	GO:0046658	anchored component of plasma membrane	GO:0030154	cell differentiation	GO:0000981	DNA-binding transcription factor activity, RNA polymerase II-specific	GO:0005634	nucleus
Molting	175	GSE46291	L3 lethargus vs. active L3	0.37	GO:0006508	proteolysis	GO:0008237	metallopeptidase activity	GO:0005615	extracellular space	GO:0035317	imaginal disc-derived wing hair organization	GO:0016153	urocanate hydratase activity	GO:0071683	sensory dendrite
					GO:0018996	molting cycle, collagen and cuticulin-based cuticle	GO:0042302	structural constituent of cuticle	GO:0005576	extracellular region	GO:0006547	histidine metabolic process	GO:0003785	actin monomer binding	GO:0097730	non-motile cilium
	176	GSE35360	humic acid vs. untreated	0.2	GO:0055114	oxidation-reduction process	GO:0016491	oxidoreductase activity	GO:0005777	peroxisome	GO:0055085	transmembrane transport	GO:0008194	UDP-glycosyltransferase activity	GO:0043231	intracellular membrane-bounded organelle
					GO:0098542	defense response to other organism	GO:0016788	hydrolase activity, acting on ester bonds	GO:0005764	lysosome	GO:0009437	carnitine metabolic process	GO:0016758	transferase activity, transferring hexosyl groups	GO:0005811	lipid droplet
	177	GSE9665	elt-1 vs. control embryo	0.37	GO:0043547	positive regulation of GTPase activity	GO:0017137	Rab GTPase binding	GO:0005769	early endosome	GO:0006750	glutathione biosynthetic process	GO:0004175	endopeptidase activity	GO:0005829	cytosol
					GO:1903358	regulation of Golgi organization	GO:0016787	hydrolase activity	GO:0000785	chromatin	GO:0006890	retrograde vesicle-mediated transport, Golgi to ER	GO:0005515	protein binding	GO:0019774	proteasome core complex, beta-subunit complex
Muscle contraction genes	178	GSE9682	rheb-1 RNAi vs. control	0.14	GO:0006936	muscle contraction	GO:0003779	actin binding	GO:0005615	extracellular space	GO:0009062	fatty acid catabolic process	GO:0047617	acyl-CoA hydrolase activity	GO:0005782	peroxisomal matrix
					GO:0010951	negative regulation of endopeptidase activity	GO:0051015	actin filament binding	GO:0005604	basement membrane	GO:0006637	acyl-CoA metabolic process	GO:0016705	oxidoreductase activity, acting on paired donors, with incorporation or reduction of molecular oxygen	GO:0030688	preribosome, small subunit precursor
	179	GSE9897	mev-1 vs. control	-0.36	GO:0050830	defense response to Gram-positive bacterium	GO:0042302	structural constituent of cuticle	GO:0005581	collagen trimer	GO:0046487	glyoxylate metabolic process	GO:0008903	hydroxypyruvate isomerase activity	GO:0005849	mRNA cleavage factor complex
					GO:0019835	cytolysis	GO:0016757	transferase activity, transferring glycosyl groups	GO:0031012	extracellular matrix	GO:0007292	female gamete generation	GO:1905502	acetyl-CoA binding	GO:0044841	gut granule membrane
Oxidative stress response	180	GSE9301	oxidative stress vs. control	0.44	O	innate immune response	GO:0004812	aminoacyl-tRNA ligase activity	GO:0043231	intracellular membrane-bounded organelle	GO:0055114	oxidation-reduction process	GO:0016491	oxidoreductase activity	GO:0045121	membrane raft
					GO:0006418	tRNA aminoacylation for protein translation	GO:0008194	UDP-glycosyltransferase activity	GO:0017101	aminoacyl-tRNA synthetase multienzyme complex	GO:0008611	ether lipid biosynthetic process	GO:0004658	propionyl-CoA carboxylase activity	GO:0005778	peroxisomal membrane
	181	none	none	none	GO:0016197	endosomal transport	GO:0005525	GTP binding	GO:0030027	lamellipodium	GO:0036003	positive regulation of transcription from RNA polymerase II promoter in response to stress	GO:0016301	kinase activity	GO:0000932	P-body
					GO:0007399	nervous system development	GO:0019905	syntaxin binding	GO:0032809	neuronal cell body membrane	GO:0040034	regulation of development, heterochronic	GO:0004672	protein kinase activity	GO:0032040	small-subunit processome
	182	none	none	none	GO:0019835	cytolysis	GO:0003796	lysozyme activity	GO:0043231	intracellular membrane-bounded organelle	GO:0006811	ion transport	GO:0008194	UDP-glycosyltransferase activity	GO:0043231	intracellular membrane-bounded organelle
					GO:0042742	defense response to bacterium	GO:0017128	phospholipid scramblase activity	GO:0031680	G-protein beta/gamma-subunit complex	GO:0055085	transmembrane transport	GO:0016758	transferase activity, transferring hexosyl groups	GO:0016021	integral component of membrane
	183	none	none	none	GO:0006102	isocitrate metabolic process	GO:0019887	protein kinase regulator activity	GO:0070469	respiratory chain	GO:0006541	glutamine metabolic process	GO:0004070	aspartate carbamoyltransferase activity	GO:1902636	kinociliary basal body
					GO:0045859	regulation of protein kinase activity	GO:0016616	oxidoreductase activity, acting on the CH-OH group of donors, NAD or NADP as acceptor	GO:0005747	mitochondrial respiratory chain complex I	GO:0006997	nucleus organization	GO:0004088	carbamoyl-phosphate synthase (glutamine-hydrolyzing) activity	GO:0031430	M band
	184	GSE41056	rde-1 vs. N2	0.2	GO:0050830	defense response to Gram-positive bacterium	GO:0030246	carbohydrate binding	GO:0035657	eRF1 methyltransferase complex	GO:0045087	innate immune response	GO:0004185	serine-type carboxypeptidase activity	GO:0045121	membrane raft
					GO:0009410	response to xenobiotic stimulus	GO:0008061	chitin binding	GO:0031224	intrinsic component of membrane	GO:0010332	response to gamma radiation	GO:0004180	carboxypeptidase activity	GO:0031466	Cul5-RING ubiquitin ligase complex
	185	GSE23528	Light-dark entrained vs. non-entrained	-0.19	GO:1904491	protein localization to ciliary transition zone	GO:0000981	DNA-binding transcription factor activity, RNA polymerase II-specific	GO:0035869	ciliary transition zone	GO:0042338	cuticle development involved in collagen and cuticulin-based cuticle molting cycle	GO:0042302	structural constituent of cuticle	GO:0005581	collagen trimer
					GO:1905515	non-motile cilium assembly	GO:0005509	calcium ion binding	GO:0005930	axoneme	GO:0043413	macromolecule glycosylation	GO:0042329	structural constituent of collagen and cuticulin-based cuticle	GO:0060102	collagen and cuticulin-based cuticle extracellular matrix
	186	GSE41366	dichlorvos treated vs. untreated	-0.34	GO:1905516	positive regulation of fertilization	GO:0042302	structural constituent of cuticle	GO:0005581	collagen trimer	GO:0006362	transcription elongation from RNA polymerase I promoter	GO:0005246	calcium channel regulator activity	GO:0005886	plasma membrane
					GO:0048026	positive regulation of mRNA splicing, via spliceosome	GO:0004197	cysteine-type endopeptidase activity	GO:1904115	axon cytoplasm	GO:0006666	3-keto-sphinganine metabolic process	GO:0003924	GTPase activity	GO:0000015	phosphopyruvate hydratase complex
GLD-1 targets	187	GSE21591	mRNAs co-IPed with GLD-1	0.65	GO:0009792	embryo development ending in birth or egg hatching	GO:0005515	protein binding	GO:0005634	nucleus	GO:0006414	translational elongation	GO:0003746	translation elongation factor activity	GO:0005751	mitochondrial respiratory chain complex IV
					GO:0007049	cell cycle	GO:0019899	enzyme binding	GO:0005737	cytoplasm	GO:0006123	mitochondrial electron transport, cytochrome c to oxygen	GO:0004129	cytochrome-c oxidase activity	GO:0005832	chaperonin-containing T-complex
	188	none	none	none	GO:0035065	regulation of histone acetylation	GO:0005267	potassium channel activity	GO:0031499	TRAMP complex	GO:0051659	maintenance of mitochondrion location	GO:0004658	propionyl-CoA carboxylase activity	GO:0031205	endoplasmic reticulum Sec complex
					GO:0071050	snoRNA polyadenylation	GO:0035034	histone acetyltransferase regulator activity	GO:0097179	protease inhibitor complex	GO:1905188	positive regulation of metaphase/anaphase transition of meiosis I	GO:0032947	protein-containing complex scaffold activity	GO:1990805	central cylinder
Heme transport	189	GSE34471	20uM vs. 4uM heme	-0.09	GO:0015886	heme transport	GO:0015232	heme transporter activity	GO:0043231	intracellular membrane-bounded organelle	GO:0036499	PERK-mediated unfolded protein response	GO:0008233	peptidase activity	GO:0016507	mitochondrial fatty acid beta-oxidation multienzyme complex
					GO:0006082	organic acid metabolic process	GO:0008194	UDP-glycosyltransferase activity	GO:0005764	lysosome	GO:0006508	proteolysis	GO:0008234	cysteine-type peptidase activity	GO:0005615	extracellular space
	190	none	none	none	GO:0016486	peptide hormone processing	GO:0005125	cytokine activity	GO:0005802	trans-Golgi network	GO:0006979	response to oxidative stress	GO:0008375	acetylglucosaminyltransferase activity	GO:0016020	membrane
					GO:0001731	formation of translation preinitiation complex	GO:0003743	translation initiation factor activity	GO:0030056	hemidesmosome	GO:0006493	protein O-linked glycosylation	GO:0017137	Rab GTPase binding	GO:0016021	integral component of membrane
	191	none	none	none	GO:0006749	glutathione metabolic process	GO:0016705	oxidoreductase activity, acting on paired donors, with incorporation or reduction of molecular oxygen	GO:0043231	intracellular membrane-bounded organelle	GO:0006082	organic acid metabolic process	GO:0008395	steroid hydroxylase activity	GO:0098894	extrinsic component of presynaptic endocytic zone membrane
					GO:0055114	oxidation-reduction process	GO:0004497	monooxygenase activity	GO:0005575	cellular_component	GO:0042738	exogenous drug catabolic process	GO:0016712	oxidoreductase activity, acting on paired donors, with incorporation or reduction of molecular oxygen, reduced flavin or flavoprotein as one donor, and incorporation of one atom of oxygen	GO:0043231	intracellular membrane-bounded organelle
	192	GSE42592	acrylamide treated vs. untreated	-0.07	GO:0006355	regulation of transcription, DNA-templated	GO:0008270	zinc ion binding	GO:0043235	receptor complex	GO:0045943	positive regulation of transcription by RNA polymerase I	GO:0004386	helicase activity	GO:0005730	nucleolus
					GO:0015910	peroxisomal long-chain fatty acid import	GO:0043565	sequence-specific DNA binding	GO:0019005	SCF ubiquitin ligase complex	GO:0042157	lipoprotein metabolic process	GO:0008967	phosphoglycolate phosphatase activity	GO:0005576	extracellular region
	193	none	none	none	GO:0007186	G protein-coupled receptor signaling pathway	GO:0016747	transferase activity, transferring acyl groups other than amino-acyl groups	GO:0016021	integral component of membrane	GO:0035721	intraciliary retrograde transport	GO:0008289	lipid binding	GO:0005930	axoneme
					GO:0050911	detection of chemical stimulus involved in sensory perception of smell	GO:0004984	olfactory receptor activity	GO:0016020	membrane	GO:0042073	intraciliary transport	GO:0003676	nucleic acid binding	GO:0030991	intraciliary transport particle A
	194	GSE2180	pie-1; pal-1 vs. pie-1 186 min after 4-cell embryo	0.3	GO:0009792	embryo development ending in birth or egg hatching	GO:0005515	protein binding	GO:0005737	cytoplasm	GO:0043277	apoptotic cell clearance	GO:0019904	protein domain specific binding	GO:0031463	Cul3-RING ubiquitin ligase complex
					GO:0002119	nematode larval development	GO:0000166	nucleotide binding	GO:0005634	nucleus	GO:0044255	cellular lipid metabolic process	GO:0000981	DNA-binding transcription factor activity, RNA polymerase II-specific	GO:0014069	postsynaptic density
	195	GSE38997	UVC treated vs. control	0.05	GO:0055114	oxidation-reduction process	GO:0005506	iron ion binding	GO:0043231	intracellular membrane-bounded organelle	GO:0055114	oxidation-reduction process	GO:0030246	carbohydrate binding	GO:0005576	extracellular region
					GO:0006082	organic acid metabolic process	GO:0008395	steroid hydroxylase activity	GO:0005746	mitochondrial respiratory chain	GO:0010780	meiotic DNA double-strand break formation involved in reciprocal meiotic recombination	GO:0020037	heme binding	GO:0005615	extracellular space
	196	none	none	none	GO:0000028	ribosomal small subunit assembly	GO:0003735	structural constituent of ribosome	GO:0005840	ribosome	GO:0006412	translation	GO:0003735	structural constituent of ribosome	GO:0005840	ribosome
					GO:0002181	cytoplasmic translation	GO:0003723	RNA binding	GO:0005737	cytoplasm	GO:0006465	signal peptide processing	GO:0015078	proton transmembrane transporter activity	GO:0022625	cytosolic large ribosomal subunit
	197	none	none	none	GO:0046835	carbohydrate phosphorylation	GO:0046872	metal ion binding	GO:0043292	contractile fiber	GO:1902667	regulation of axon guidance	GO:0005085	guanyl-nucleotide exchange factor activity	GO:0016363	nuclear matrix
					GO:0030154	cell differentiation	GO:0008395	steroid hydroxylase activity	GO:0005737	cytoplasm	GO:0007264	small GTPase mediated signal transduction	GO:0004092	carnitine O-acetyltransferase activity	GO:0036020	endolysosome membrane
	198	none	none	none	GO:0007186	G protein-coupled receptor signaling pathway	GO:0008528	G protein-coupled peptide receptor activity	GO:0016021	integral component of membrane	GO:0010470	regulation of gastrulation	GO:0005219	ryanodine-sensitive calcium-release channel activity	GO:0005790	smooth endoplasmic reticulum
					GO:0050911	detection of chemical stimulus involved in sensory perception of smell	GO:0038022	G protein-coupled olfactory receptor activity	GO:0016020	membrane	GO:0051639	actin filament network formation	GO:0016231	beta-N-acetylglucosaminidase activity	GO:0034704	calcium channel complex
	199	GSE42192	Fed with Lactobacillus rhamnosus vs. OP50	-0.06	GO:0030240	skeletal muscle thin filament assembly	GO:0034511	U3 snoRNA binding	GO:0005739	mitochondrion	GO:0007078	lamin depolymerization	GO:0004658	propionyl-CoA carboxylase activity	GO:0008305	integrin complex
					GO:0043547	positive regulation of GTPase activity	GO:0000048	peptidyltransferase activity	GO:0005759	mitochondrial matrix	GO:0008615	pyridoxine biosynthetic process	GO:0004733	pyridoxamine-phosphate oxidase activity	GO:0043292	contractile fiber
Response to pathogenic bacteria	200	GSE50513	Fed P. aeruginosa PA14 vs. E. coli OP50	0.51	GO:0045087	innate immune response	GO:0030246	carbohydrate binding	GO:0045121	membrane raft	GO:0055114	oxidation-reduction process	GO:0016491	oxidoreductase activity	GO:0005764	lysosome
					GO:0050829	defense response to Gram-negative bacterium	GO:0000981	DNA-binding transcription factor activity, RNA polymerase II-specific	GO:0016235	aggresome	GO:0050830	defense response to Gram-positive bacterium	GO:0016787	hydrolase activity	GO:0046930	pore complex
	201	GSE43959	Fed OP50 vs. HT115 E.coli	0.24	GO:0055114	oxidation-reduction process	GO:0016491	oxidoreductase activity	GO:0005739	mitochondrion	GO:0045087	innate immune response	GO:0016788	hydrolase activity, acting on ester bonds	GO:0005764	lysosome
					GO:0006730	one-carbon metabolic process	GO:0003985	acetyl-CoA C-acetyltransferase activity	GO:0005829	cytosol	GO:0008152	metabolic process	GO:0016798	hydrolase activity, acting on glycosyl bonds	GO:0031224	intrinsic component of membrane
	202	GSE27677	Fasted for 36 h vs. fed	0.18	GO:0030042	actin filament depolymerization	GO:0043565	sequence-specific DNA binding	GO:0030016	myofibril	GO:0006357	regulation of transcription by RNA polymerase II	GO:0000257	nitrilase activity	GO:0005667	transcription factor complex
					GO:0030837	negative regulation of actin filament polymerization	GO:0031490	chromatin DNA binding	GO:0016528	sarcoplasm	GO:0002949	tRNA threonylcarbamoyladenosine modification	GO:0001223	transcription coactivator binding	GO:0000408	EKC/KEOPS complex
	203	GSE9665	230 min vs. 186 min embryo	0.73	GO:0007275	multicellular organism development	GO:0003700	DNA-binding transcription factor activity	GO:0005604	basement membrane	GO:0006520	cellular amino acid metabolic process	GO:0004046	aminoacylase activity	GO:0005737	cytoplasm
					GO:0006559	L-phenylalanine catabolic process	GO:0033613	activating transcription factor binding	GO:0005886	plasma membrane	GO:0008078	mesodermal cell migration	GO:0004368	glycerol-3-phosphate dehydrogenase (quinone) activity	GO:0009331	glycerol-3-phosphate dehydrogenase complex
	204	GSE9246	sir-2 vs. N2 L1	-0.25	GO:0002119	nematode larval development	GO:0000166	nucleotide binding	GO:0005737	cytoplasm	GO:0000381	regulation of alternative mRNA splicing, via spliceosome	GO:0003723	RNA binding	GO:0000111	nucleotide-excision repair factor 2 complex
					GO:0016310	phosphorylation	GO:0004674	protein serine/threonine kinase activity	GO:0005623	cell	GO:0002191	cap-dependent translational initiation	GO:0004551	nucleotide diphosphatase activity	GO:0071942	XPC complex
	205	GSE54024	ced-4 vs. N2	0.35	GO:0042338	cuticle development involved in collagen and cuticulin-based cuticle molting cycle	GO:0042302	structural constituent of cuticle	GO:0005581	collagen trimer	GO:0046487	glyoxylate metabolic process	GO:0004222	metalloendopeptidase activity	GO:0005818	aster
					GO:0018996	molting cycle, collagen and cuticulin-based cuticle	GO:0042329	structural constituent of collagen and cuticulin-based cuticle	GO:0005615	extracellular space	GO:0055114	oxidation-reduction process	GO:0008237	metallopeptidase activity	GO:0005828	kinetochore microtubule
	206	none	none	none	GO:0045056	transcytosis	GO:0003993	acid phosphatase activity	GO:0016020	membrane	GO:0042060	wound healing	GO:0031005	filamin binding	GO:0031314	extrinsic component of mitochondrial inner membrane
					GO:1902476	chloride transmembrane transport	GO:0005159	insulin-like growth factor receptor binding	GO:0016021	integral component of membrane	GO:0045104	intermediate filament cytoskeleton organization	GO:0048306	calcium-dependent protein binding	GO:0005861	troponin complex
	207	GSE12298	dichlorvos vs. untreated	0.1	GO:0009062	fatty acid catabolic process	GO:0047617	acyl-CoA hydrolase activity	GO:0005782	peroxisomal matrix	GO:0055085	transmembrane transport	GO:0016705	oxidoreductase activity, acting on paired donors, with incorporation or reduction of molecular oxygen	GO:0043231	intracellular membrane-bounded organelle
					GO:0006637	acyl-CoA metabolic process	GO:0004497	monooxygenase activity	GO:0043231	intracellular membrane-bounded organelle	GO:1990170	stress response to cadmium ion	GO:0004497	monooxygenase activity	GO:0005615	extracellular space
	208	GSE9665	230 min vs. 143 min embryo	-0.25	GO:0036498	IRE1-mediated unfolded protein response	GO:0051287	NAD binding	GO:0034388	Pwp2p-containing subcomplex of 90S preribosome	GO:0048665	neuron fate specification	GO:0008186	RNA-dependent ATPase activity	GO:0070545	PeBoW complex
					GO:0003400	regulation of COPII vesicle coating	GO:0016740	transferase activity	GO:0008305	integrin complex	GO:0007638	mechanosensory behavior	GO:0000341	RNA trimethylguanosine cap binding	GO:0016281	eukaryotic translation initiation factor 4F complex
	209	none	none	none	GO:0016192	vesicle-mediated transport	GO:0004660	protein farnesyltransferase activity	GO:0005737	cytoplasm	GO:0043407	negative regulation of MAP kinase activity	GO:0004129	cytochrome-c oxidase activity	GO:0005743	mitochondrial inner membrane
					GO:0018343	protein farnesylation	GO:0003743	translation initiation factor activity	GO:0005965	protein farnesyltransferase complex	GO:0046855	inositol phosphate dephosphorylation	GO:0008324	cation transmembrane transporter activity	GO:0031305	integral component of mitochondrial inner membrane
